1 **Title: Deep predictive coding accounts for emergence of complex neural response**  
2 **properties along the visual cortical hierarchy**

3 **Authors:** S. Dora<sup>1,3</sup>, S. M. Bohte<sup>1,2</sup>, C.M.A. Pennartz<sup>1</sup>

4

5 <sup>1</sup>Swammerdam Institute for Life Sciences,

6 University of Amsterdam, Amsterdam, The Netherlands

7 <sup>2</sup>Machine Learning Group,

8 Centrum Wiskunde & Informatica, Amsterdam, The Netherlands

9 <sup>3</sup>Intelligent Systems Research Centre,

10 MS, University of Ulster, Magee Campus, Londonderry, United Kingdom

11

12

13

14

## 15 **Abstract**

16 Predictive coding provides a computational paradigm for modelling perceptual processing  
17 as the construction of representations accounting for causes of sensory inputs. Here, we  
18 develop a scalable, deep predictive coding network that is trained using a Hebbian learning  
19 rule. Without *a priori* constraints that would force model neurons to respond like biological  
20 neurons, the model exhibits properties similar to those reported in experimental studies.  
21 We analyze low- and high-level properties such as orientation selectivity, object selectivity  
22 and sparseness of neuronal populations in the model. As reported experimentally, image  
23 selectivity increases systematically across ascending areas in the model hierarchy. A further  
24 emergent network property is that representations for different object classes become  
25 more distinguishable from lower to higher areas. Thus, deep predictive coding networks can  
26 be effectively trained using biologically plausible principles and exhibit emergent properties  
27 that have been experimentally identified along the visual cortical hierarchy.

28

## 29 **Significance Statement**

30 Understanding brain mechanisms of perception requires a computational approach based  
31 on neurobiological principles. Many deep learning architectures are trained by supervised  
32 learning from large sets of labeled data, whereas biological brains must learn from  
33 unlabeled sensory inputs. We developed a Predictive Coding methodology for building  
34 scalable networks that mimic deep sensory cortical hierarchies, perform inference on the  
35 causes of sensory inputs and are trained by unsupervised, Hebbian learning. The network  
36 models are well-behaved in that they faithfully reproduce visual images based on high-level,  
37 latent representations. When ascending the sensory hierarchy, we find increasing image  
38 selectivity, sparseness and generalizability for object classification. These models show how

39 a complex neuronal phenomenology emerges from biologically plausible, deep networks for  
40 unsupervised perceptual representation.

41

## 42 **Introduction**

43 According to classical neurophysiology, perception is thought to be based on sensory  
44 neurons which extract knowledge from the world by detecting objects and features, and  
45 report these to the motor apparatus for behavioral responding (Barlow, 1953; Lettvin et al.,  
46 1959; Riesenhuber and Poggio, 1999). This doctrine is radically modified by the proposal  
47 that percepts of objects and their features are representations constructed by the brain in  
48 attempting to account for the causes of the sensory inputs it receives (Friston, 2005;  
49 Gregory, 1980; Helmholtz, 1867; Helmholtz and Southall, 2005; Kant, 1998; Mumford, 1992;  
50 Pennartz, 2015). This constructivist view is supported, amongst others, by the perceptual  
51 psychology of illusions (Gregory, 1980; Grosf et al., 1993), but also by the uniform nature  
52 of action potentials conveying sensory information to the brain, unlabeled in terms of  
53 peripheral origin or modality (Pennartz, 2015, 2009). A promising computational paradigm  
54 for generating internal world models is predictive coding (Dayan, Hinton, Neal, & Zemel,  
55 1995; Friston, 2005; Rao & Ballard, 1999; Srinivasan, Laughlin, & Dubs, 1982; cf. Lee &  
56 Mumford, 2003). Predictive coding posits that higher areas of a sensory cortical hierarchy  
57 generate predictions about the causes of the sensory inputs they receive, and transmit  
58 these predictions via feedback projections to lower areas, which compute the errors  
59 between predictions and actual sensory input. These errors are transmitted to higher areas  
60 via feedforward projections and are used both for updating the inferential representations  
61 of causes and for learning by modifications of synaptic weights (Rao and Ballard, 1999).

62 In addition to being aligned with the feedforward and feedback architecture of sensory  
63 cortical hierarchies (Felleman and Van Essen, 1991; Markov et al., 2014), the occurrence of  
64 some form of predictive coding in the brain is supported by accumulating experimental  
65 evidence. Neurons in the superficial layers of area V1 in mice navigating in virtual reality  
66 were shown to code error signals when visual inputs were not matched by concurrent  
67 motor predictions (Keller et al., 2012; Keller and Mrsic-Flogel, 2018; Leinweber et al., 2017).  
68 As expected for predictive coding, indications for a bottom-up/top-down loop structure  
69 with retinotopic matching were found by Marques et. al., 2018 for a lower (V1) and higher  
70 (LM) area in the mouse brain. In monkeys, evidence for coding of predictions and errors has  
71 been reported for the face-processing area ML (Schwiedrzik and Freiwald, 2017). In humans,  
72 predictive coding is supported by reports of spatially occluded scene information in V1  
73 (Smith and Muckli, 2010) and suppressed sensory responses to predictable stimuli along the  
74 visual hierarchy (Richter et al., 2018).

75 While foundational work has been done in the computational modeling of predictive coding,  
76 there is a strong need to investigate how these early models - which were often hand-  
77 crafted and limited to only one or two processing layers (Rao and Ballard, 1999; Spratling,  
78 2012a, 2008; Wacongne et al., 2012) - can be expanded to larger and deeper networks in a  
79 neurobiologically plausible manner. For instance, previous models studying attentional  
80 modulation or genesis of low-level response properties of V1 neurons (such as orientation  
81 selectivity) were limited to only a few units (Spratling, 2008) or to one processing layer  
82 devoid of top-down input (Spratling, 2010; Wacongne et al., 2012).

83 Thus we set out, first, to develop a class of predictive coding models guided by  
84 computational principles that allow architectures to be extended to many layers (i.e.  
85 hierarchically stacked brain areas) with essentially arbitrarily large numbers of neurons and

86 synapses. Second, learning in these models was required to be based on neurobiological  
87 principles, which led us to use unsupervised, Hebbian learning instead of back-propagation  
88 (Rumelhart et al., 1986) or other AI training methods (Lillicrap et al., 2016; Salimans et al.,  
89 2017) incompatible with physiological principles.

90 Third, we aimed to investigate which neuronal response properties evolve emergently in  
91 both low and high-level areas, i.e. without being explicitly imposed *a priori* by network  
92 design constraints. We paid attention to both low-level visual cortical properties such as  
93 orientation selectivity (Hubel and Wiesel, 1961) as well as high-level properties such as  
94 selectivity for whole images or objects found in e.g. inferotemporal cortex (Desimone et al.,  
95 1984; Gross et al., 1972; Perrett et al., 1985).

96

## 97 **Materials & Methods**

### 98 **Architecture of the Model with Receptive Fields**

99 It is known that Receptive Field (RF) size increases from low to high-level areas in the ventral stream  
100 (V1, V2, V4 and inferotemporal cortex (IT)) of the visual system (Kobatake and Tanaka, 1994). To  
101 incorporate this characteristic, neurons in the lowermost area of our network (e.g. V1) respond to a  
102 small region of visual space. Similarly, neurons in the next area (e.g. secondary visual cortex (V2)) are  
103 recurrently connected to a small number of neurons in V1 so that their small RFs jointly represent  
104 the larger RF of a V2 neuron. This architectural property is used in all areas of the network, resulting  
105 in a model with increasing RF size from lower-level to higher-level areas. Furthermore, there can be  
106 multiple neurons in each area having identical RFs (i.e., neurons that respond to the same region in  
107 visual space). This property is commonly associated with neurons within cortical microcolumns  
108 (Jones, 2000).

109 The model variants described in this paper receive natural images in RGB color model as sensory  
110 input of which the size is described by two dimensions representing the height and width of an

111 image. Similarly, RFs of neurons in visual cortical areas extend horizontally as well as vertically. To  
112 simplify the explanation below, we will assume that the input to the network is one-dimensional and  
113 correspondingly neurons in the model also have receptive fields that can be expressed using a single  
114 dimension. Later, we will extend the description to two-dimensional sensory input.

115 Figure 1 shows the architecture of the network. Consider a network with  $(N + 1)$  layers which are  
116 numbered from 0 to  $N$ . The layers 1 to  $N$  in the network correspond to visual cortical areas; layer 1  
117 represents the lowest area (e.g. primary visual cortex (V1)) and layer  $N$  the highest cortical area (e.g.  
118 area IT). Layer 0 presents sensory inputs to the network. Below, we will use the term “area” to refer  
119 to a distinct layer in the model in line with the correspondence highlighted above. Each area is  
120 recurrently connected to the area below it. Information propagating from a lower-level to a higher-  
121 level area constitutes feedforward flow of information (also termed bottom-up input) and feedback  
122 (also known as top-down input) comprises information propagating in the other direction.  
123 Conventionally, the term “receptive field” of a neuron describes a group of neurons that send  
124 afferent projections to this neuron. In other words, a receptive field characterizes the direction of  
125 connectivity between a group of neurons and a “reference” neuron. Here, the term receptive field is  
126 used to characterize the hierarchical location of a group of neurons with respect to a reference  
127 neuron. Specifically, the receptive field of a neuron represents a group of neurons in a lower-level  
128 area that are recurrently connected to the higher-level neuron  $x$ . Similarly, the group of cells that  
129 receive projections from a given neuron represents the projective field of that neuron. In the current  
130 paper the term “projective field” of a neuron  $x$  describes a group of higher-level neurons that are  
131 recurrently connected to the lower-level neuron  $x$ .

132 Neurons in the  $l^{th}$  area are organized in populations of  $n_l$  neurons having identical receptive and  
133 projective fields. Populations having an equal number of neurons are used to reduce computational  
134 overhead. The activity of the  $k^{th}$  population in the  $l^{th}$  area, referred to as  $p_{k_l}$ , is a  $(n_l \text{ by } 1)$  vector  
135 denoted by  $y_{k_l}$ . To reduce computational complexity, we assume that the receptive fields of all  
136 neurons in the  $l^{th}$  area are of equal size, denoted by  $s_l$ , and the receptive fields of two consecutive

137 populations have an overlap of  $(s_l - 1)$ . The population  $p_{k_l}$  is reciprocally connected with  
138 populations  $p_{k_{l-1}}$  through  $p_{(k+s_l-1)_{l-1}}$  (Figure 1). Thus, the number of populations (with distinct  
139 receptive fields) in the  $l^{th}$  area is  $(s_l - 1)$  less than the number of populations in the  $(l - 1)^{th}$  area.  
140 The synaptic strengths of connections between the populations  $p_{k_l}$  and  $p_{k_{l-1}}$  is a  $(n_{l-1}$  by  $n_l$ ) matrix  
141 denoted by  $W_{k_{l-1}k_l}$ . We assume that the neuronal populations  $p_{k_l}$  and  $p_{k_{l-1}}$  are connected by  
142 symmetric weights, i.e. feedforward and feedback projections between these populations have  
143 equal synaptic strengths. The top-down information transmitted by population  $p_{k_l}$  to  $p_{k_{l-1}}$  is  
144 denoted by  $\hat{y}_{k_{l-1}}^{k_l}$  and is given by

$$\hat{y}_{k_{l-1}}^{k_l} = \phi(W_{k_{l-1}k_l}y_{k_l}) \quad (1)$$

145 where  $\phi$  is the activation function of a neuron. Predictions (see section “Learning and inference  
146 rule”) about activities of the population  $p_{k_{l-1}}$  are denoted by  $\hat{y}_{k_{l-1}}^{k_l}$ . Neuronal activity is described in  
147 terms of firing rate, which by definition can never be negative. Therefore, we used a Rectified Linear  
148 Unit (ReLU) as an activation function which is defined as

$$\phi(x) = \max(x, 0) \quad (2)$$

149 which results in values that are positive or zero. To extend the architecture described above for  
150 handling natural images, the populations in each area can be visualized as a two-dimensional grid  
151 (Figure 1B). Here, each population has receptive fields that extend both horizontally as well as  
152 vertically.

### 153 **Learning and Inference Rule**

154 The learning rule presented in this section is inspired by the approach of predictive coding in (Rao  
155 and Ballard, 1999). Each area of the model infers causes that are used to generate predictions about  
156 causes inferred at the level below. These predictions are sent by a higher-level area to a lower-level  
157 area via feedback connections. The lower-level area computes an error in the received predictions,  
158 as compared to its bottom-up input, and transmits this error to the higher-level area via feedforward  
159 pathways. The information received by an area is used to infer better causes, which is termed the

160 *inference* step of predictive coding, and also to build the brain's internal model of the external  
 161 environment, which is termed the *learning* step.

162 Figure 2 shows a possible neural implementation of predictive coding for a one-dimensional sensory  
 163 input. For a given sensory input, the neuronal activities ( $[y_{1l}, \dots, y_{kl}, \dots]$ ) of all neurons in the  $l^{th}$   
 164 area collectively denote the causes of the sensory input inferred in this area. Based on these causes,  
 165 the prediction of causes inferred in the  $(l - 1)^{th}$  area is estimated according to Equation 1. Note  
 166 that a given neuronal population in the  $l^{th}$  area will generate predictions only about the neuronal  
 167 populations within its receptive field (Figure 2). Therefore, neuronal populations in the  $l^{th}$  area  
 168 receive bottom-up errors via feedforward connections only from lower-level populations within  
 169 their receptive field. Relative to area  $l$ , the bottom-up error ( $\beta_{kl}^{k_{l-1}}$ ) based on the prediction  
 170 generated by  $p_{kl}$  about the activity of  $p_{k_{l-1}}$  is computed as:

$$\beta_{kl}^{k_{l-1}} = (y_{k_{l-1}} - \hat{y}_{k_{l-1}}^{k_l}) \quad (3)$$

171 The computation of this bottom-up error occurs in the  $(l - 1)^{th}$  area (Figure 2) and is transmitted to  
 172 the  $l^{th}$  area via feedforward projections. The simulations in this paper use a summation of squared  
 173 bottom-up errors ( $e_{kl}^\beta$ ) received from populations in the receptive fields of  $p_{kl}$ , which is given as

$$e_{kl}^\beta = \sum_{j=k}^{k+s_l-1} (\beta_{kl}^{j_{l-1}})^2 \quad (4)$$

174 In general, other biologically plausible functions of bottom-up errors can also be used in simulations.  
 175 Along with bottom-up errors, neurons in the  $l^{th}$  area also receive a top-down prediction from  
 176 neurons in the  $(l + 1)^{th}$  area. Due to an overlap of  $(s_{l+1} - 1)$  between two consecutive receptive  
 177 fields in area  $(l + 1)$ , populations in the  $l^{th}$  area will be present in the projective fields of  $s_{l+1}$   
 178 populations in the  $(l + 1)^{th}$  area (Figure 1A). Populations in the  $l^{th}$  area whose receptive fields are  
 179 closer to the boundary of the visual space are an exception to this property as these neurons will be  
 180 present in the projective fields of fewer than  $s_{l+1}$  populations. Here, we will focus on the general  
 181 case. The population  $p_{kl}$  will receive top-down predictions from neuronal populations  $p_{(k-s_{l+1}+1)_{l+1}}$



182 through  $p_{k_{l+1}}$ . The error based on the top-down prediction of the neuronal activity of the population  
 183  $p_{k_l}$  generated by the population  $p_{k_{l+1}}$  is computed as

$$\beta_{k_{l+1}}^{k_l} = (\mathbf{y}_{k_l} - \hat{\mathbf{y}}_{k_l}^{k_{l+1}}) \quad (5)$$

184 The computation of this top-down error occurs in the  $l^{\text{th}}$  area (Figure 2). In turn, this error will also  
 185 constitute the bottom-up error for the population  $p_{k_{l+1}}$ . Thus, whether an error signal is labeled  
 186 bottom-up or top-down is defined relative to the area under scrutiny. The superscript and subscript  
 187 in  $\beta_{k_{l+1}}^{k_l}$  do not indicate a direction of signal propagation. The summation of squared errors due to  
 188 the top-down predictions received by  $p_{k_l}$  from  $p_{(k-s_{l+1}+1)_{l+1}}$  through  $p_{k_{l+1}}$  is denoted by  $e_{k_l}^\tau$  and is  
 189 given as

$$e_{k_l}^\tau = \eta \left( \sum_{i=k-s_{l+1}+1}^k (\beta_{i_{l+1}}^{k_l})^2 \right) \quad (6)$$

190 where  $\eta$  was set to one for all models unless specified otherwise (see Discussion). In addition, we  
 191 employ  $L1$ -regularization to prevent high neuronal activities. The error due to regularization (which  
 192 is symbolized by  $\rho$ ) is given as:

$$e_{y_{k_l}}^\rho = |\mathbf{y}_{k_l}| \quad (7)$$

193 The neuronal activity of a given population is estimated by performing gradient descent on the sum  
 194 of errors computed in Equations 4, 6 and 7. This results in the following update rule for inferred  
 195 causes:

$$\Delta \mathbf{y}_{k_l} = -\gamma_y \left( \sum_{i=k-s_{l+1}+1}^k \beta_{i_{l+1}}^{k_l} + \sum_{j=k}^{k+s_l-1} (\beta_{k_l}^{j_{l-1}})^T \mathbf{W}_{jk_l} + \alpha_y \ell' (e_{y_{k_l}}^\rho) \right) \quad (8)$$

196 where  $\gamma_y$  denotes the update rate for neuronal activities and  $\alpha_y$  denotes the factor which controls  
 197 how strongly the regularization penalty is imposed in comparison to other errors.  $\ell'(\cdot)$  denotes the  
 198 partial derivative of the regularization term. The update rule in Equation 8 constitutes the inference  
 199 step of predictive coding. It results in causes that better match with top-down predictions and result  
 200 in lower bottom-up errors. Higher-level areas thus influence the representations inferred in lower-

201 level areas through top-down predictions. Similarly, lower-level areas affect the representations  
 202 inferred in higher-level areas via bottom-up errors. To ensure that the neuronal activities do not  
 203 become negative after updating, we rectify the neuronal activities after every inference step using  
 204 the rectifier function (Equation 2). Note that  $\Delta \mathbf{y}_{k_l}$  depends on the activities of neuronal populations  
 205 that represent errors in the  $(l-1)^{th}$  and  $l^{th}$  areas and the synaptic strengths of the projections  
 206 between populations in these two areas (Figure 2). All of this information is available locally to the  
 207 population  $p_{k_l}$ .

208 Moreover, the strengths of the synapses between populations in any two areas are also updated  
 209 using gradient descent. As described above, an  $L1$ -regularization is imposed to avoid  
 210 indiscriminately high values of synaptic strengths. The error due to this regularization is given as:

$$e_{W_{k_{l-1}k_l}}^\rho = |W_{k_{l-1}k_l}| \quad (9)$$

211 Based on the errors defined in Equations 4 and 9, the update rule for the synaptic strengths is given  
 212 by

$$\Delta W_{k_{l-1}k_l} = -\gamma_w \left( \beta_{k_l}^{k_{l-1}} (\mathbf{y}_{k_l})^T + \alpha_w \ell' \left( e_{W_{k_{l-1}k_l}}^\rho \right) \right) \quad (10)$$

213 where  $\gamma_w$  denotes the learning rate (governing synaptic weight changes) and  $\alpha_w$  is the factor which  
 214 determines how strongly regularization is imposed relative to other errors. The learning rule of  
 215 Equation 10 constitutes the learning step of predictive coding. Note that  $\Delta W_{k_{l-1}k_l}$  depends on the  
 216 activity of the population that represents bottom-up errors and the activity of  $p_{k_l}$  and that these  
 217 two groups are postsynaptic and presynaptic relative to each other, respectively (Figure 2). In this  
 218 regard, the learning rule in Equation 10 conforms to Hebbian plasticity.

### 219 **Architecture of the Model without Receptive Fields**

220 In the generative model described above, the inferred representations are optimized to generate an  
 221 accurate prediction about causes inferred in the area below. In turn, this prediction can be used to  
 222 generate a prediction about causes inferred at the next lower level. This process can be repeated  
 223 until a prediction is generated about the sensory input in the lowest area. Using this method, it is

224 possible to obtain a reconstruction of the sensory input using representations inferred in any area of  
225 the model. This functionality is shared with autoencoders (Hinton and Zemel, 1994). Here we use  
226 these reconstructions to qualitatively study the fidelity with which information about the sensory  
227 input is preserved in different areas. Our main goal is to study neural response properties in a  
228 cortex-like architecture with feedforward and feedback processing between areas, which deviates  
229 from the structure of autoencoders. Due to presence of overlapping receptive fields, neurons in  
230 each area generate multiple reconstructions of a single sensory input at the lowest level. This makes  
231 it harder to compare the reconstructions obtained using representations inferred in different areas  
232 of the model. To avert this problem, we built a network without receptive fields that is trained by  
233 the same method used for the network with receptive fields. In the network without receptive  
234 fields, each neuron in a given area is recurrently connected to each neuron in the areas below and  
235 above it. This fully connected network contained the same number of layers as the network with  
236 receptive fields and corresponding layers of the two networks contained equal number of neurons.  
237 A single reconstruction of each sensory input was obtained using the representations inferred in  
238 different areas of the network without RFs. Examples of these reconstructions are shown in the  
239 section “Reconstruction of sensory inputs”. Besides the reconstructed sensory inputs, all other  
240 results reported here are based on the results obtained with the network having RFs.

#### 241 **Details of Training**

242 The model was trained using 2000 images of airplanes and automobiles as sensory input and these  
243 were taken from the CIFAR-10 dataset. Each image has a height and width of 32 pixels. Table 1  
244 shows the values of different hyperparameters associated with the architecture and learning rule.  
245 During training, stimuli were presented to the network in batches of 100. For each stimulus in a  
246 batch, the *inference* step (Equation 8) was executed 20 times in parallel in all areas and then the  
247 *learning* step (Equation 10) was executed once. Biologically, this corresponds to inferring  
248 representations of a sensory input on a faster time scale and updating the synapses of the

249 underlying model on a longer time scale. At the beginning of training, the activity of all neurons in  
250 the network was initialized to 0.1 and the model was trained for 25000 iterations.

251 Because the visual input is of equal height and width, populations in areas 1 to 4 can be  
252 visualized in a two-dimensional square grid of, for instance, sizes 26, 20, 14 and 8, respectively. Thus,  
253 areas 1 to 4 consist of 676, 400, 196 and 64 populations, respectively resulting in a total of 5408,  
254 6400, 6272 and 4096 neurons (number of populations times population size), respectively. However,  
255 due to regularization and the rectification of causes after the inference step, some of the neurons  
256 remain inactive for all sensory inputs. These neurons have been excluded from the analysis  
257 conducted in this paper, as they would not be detected by electrophysiological methods. At the end  
258 of a typical training session for a network with the neuron counts given above, 5393, 1280, 694 and  
259 871 neurons were active in areas 1 to 4 of the network, respectively.

260 To compute the number of synapses in the network, note that for every feedback synapse that  
261 transmits a prediction, there is a corresponding feedforward synapse that transmits an error (Figure  
262 1C). Thus, the number of feedforward and feedback synapses in the network is equal. The number of  
263 feedback synapses from a population (neurons with identical receptive fields) is equal to the product  
264 of the population size in higher-level and lower-level areas and the receptive field size in the higher  
265 level area. For example, populations in areas 1 and 2 consist of 8 and 16 neurons (Table 1),  
266 respectively, and populations in area 2 have projective fields that extend by 7 units horizontally and  
267 vertically. This results in 6272 ( $7 * 7 * 8 * 16$ ) feedback synapses from a given population in area 2.  
268 Thus, the total number of synapses between two areas is equal to 794976 (area 0 and 1), 2508800  
269 (area 1 and 2), 4917248 (area 2 and 3) and 6422528 (area 3 and 4; the number of populations times  
270 number of feedback synapses per population), respectively.

271

| Hyperparameter | Meaning          | Value (with RFs) | Value (without RFs) |
|----------------|------------------|------------------|---------------------|
| $N$            | Number of layers | 4                | 4                   |

|                                  |                                             |       |                 |
|----------------------------------|---------------------------------------------|-------|-----------------|
| $s_l, \forall l \in \{1,2,3,4\}$ | Size of receptive fields                    | 7     | Fully connected |
| $n_1$                            | Number of neurons in a population in area 1 | 8     | 5408            |
| $n_2$                            | Number of neurons in a population in area 2 | 16    | 6400            |
| $n_3$                            | Number of neurons in a population in area 3 | 32    | 6272            |
| $n_4$                            | Number of neurons in a population in area 4 | 64    | 4096            |
| $\gamma_y$                       | Update rate for inference                   | 0.05  | 0.0005          |
| $\gamma_w$                       | Learning rate for synapses                  | 0.05  | 0.0005          |
| $\alpha_y$                       | Regularization for causes                   | 0.001 | 0.0001          |
| $\alpha_w$                       | Regularization for weights                  | 0.001 | 0.001           |

Table 1. Hyperparameter settings used for training the network with and without receptive fields. The size of receptive field in the network with receptive fields is equal in both image dimensions. Note that the term receptive field (RF) has been used in this table in line with its conventional definition. For the network without RFs,  $n_1$ ,  $n_2$ ,  $n_3$  and  $n_4$  are equal to the total number of neurons in each area.

272

### 273 **Analysis of Neural Properties**

274 Kurtosis is a statistical measure of the “tailedness” of a distribution. It is more sensitive to infrequent  
 275 events in comparison to frequent events in the distribution. A commonly used definition of kurtosis,  
 276 termed “excess kurtosis”, involves computing it for a given distribution with respect to the normal  
 277 distribution. Under this definition, 3 (i.e., the kurtosis value of the normal distribution) is subtracted

278 from the corresponding value of a given distribution. Given a set of observations  $(x_1, \dots, x_i, \dots, x_N)$ ,  
279 excess kurtosis, henceforth referred to simply as kurtosis, is computed using the following equation:

$$\kappa = \frac{\sum_{i=1}^N (x_i - \bar{x})^4}{Ns^4} - 3 \quad (11)$$

280 where  $\bar{x}$  and  $s$  denote the mean and standard deviation of the observations ( $N$  in total). Based upon  
281 the use of kurtosis as a measure of neuronal selectivity (Lehky et al., 2005) and sparseness (Lehky  
282 and Sereno, 2007) in experimental neuroscience, we employ it as a measure of these properties in  
283 our model. An estimate of kurtosis obtained from responses of a single neuron to all stimuli is used  
284 as an estimate of selectivity. While computing selectivity,  $N$  will be equal to the number of stimuli.  
285 Similarly, its value obtained from the responses of all neurons to a single stimulus provides an  
286 estimate of sparseness. In this case,  $N$  will be equal to the number of neurons.

287

## 288 **Results**

289 In this study we worked with two types of Deep Hebbian Predictive Coding networks (DHPC). The  
290 first type is a model without receptive fields, whereas the second model does have receptive fields.  
291 Below we will first present results from the model without receptive fields. The aim of this first  
292 modelling effort was to examine if the network is well-behaved in the sense that latent  
293 representations of causes generated in higher areas can be effectively used to regenerate the  
294 sensory input patterns in lower areas, as originally evoked by input images. Following this section we  
295 will continue with DHPC networks with receptive fields, because this type of model is better suited  
296 to examine response properties of neurons across the respective areas along the visual processing  
297 hierarchy.

### 298 **Reconstruction of sensory inputs in networks without receptive fields**

299 For the DHPC networks without receptive fields, we used a model that was trained on an image set  
300  $X$  to infer causes for an image set  $Y$  that was never presented to the network during training. Set  $X$   
301 contains images of objects from two classes, i.e. airplanes and automobiles, and set  $Y$  consists of

302 images of ten object classes namely airplanes, automobiles, birds, cats, deer, dogs, frogs, horses,  
303 ships and trucks. Note that images of airplanes and automobiles in set  $Y$  were different from images  
304 of these object classes in set  $X$ . For a given stimulus in  $Y$ , a separate reconstruction of this stimulus  
305 is obtained using the causes inferred from each area of the model. For a given area, the inferred  
306 causes transmit a prediction along the feedback pathways to the level below. This process is  
307 repeated throughout the hierarchy until a predicted sensory input is obtained at the lowest level.  
308 Figure 3 shows examples of reconstructions of novel stimuli obtained using the causes inferred in  
309 each area of the model, along with the original sensory input. The first three exemplars are of  
310 airplanes and an automobile which belong to object classes that were used to train the model. The  
311 other exemplars are reconstructions of a frog, a bird, a horse and a ship, which were never  
312 presented to the network during training, neither as exemplar nor as object class. We conclude that  
313 the reconstructions become somewhat blurrier if the generative process is initiated from higher, as  
314 opposed to lower, areas of the model, but also that the natural image statistics are captured  
315 reasonably well. This is remarkable because these inputs had never been presented to the network  
316 before.

### 317 **Orientation selectivity in a lower area of the network with receptive fields**

318 Neurons in V1 respond selectively to sensory input consisting of edges oriented at specific angles in  
319 their receptive fields (Hubel and Wiesel, 1959). The neurons in layer 1 of the model with receptive  
320 fields also exhibited this property. Importantly, this orientation selectivity was not hand-crafted or  
321 built into the network a priori, but emerged as a consequence of training the network on inputs  
322 conveying naturalistic image statistics. After training, the strengths of feedback synaptic connections  
323 between area 1 and 0 of the model resembled Gabor-like filters. Figure 4 shows plots of strengths of  
324 synapses onto a given neuron as representative examples for area 1 of the model (Figure 1C). These  
325 plots were obtained by normalizing the feedback weights of a representation neuron in area 1 to the  
326 interval  $[0,1]$ . Each image is obtained by rendering the normalized weights of a single  
327 representation neuron in area 1 as pixel intensities where each pixel corresponds to a specific

328 neuron in area 0 in the receptive field of this representation neuron. Conventionally, orientation  
329 selectivity is viewed as a property of feedforward projections to V1. The model described here uses  
330 symmetric feedforward and feedback weights (apart for their difference in sign, fig. 2), therefore the  
331 orientation selectivity illustrated here is applicable to both feedforward and feedback connections  
332 between areas 0 and 1.

### 333 **Image Selectivity**

334 Neurons in different brain areas situated along the sensory processing pathways exhibit tuning to  
335 features of increasing complexity. Whereas neurons in the primary visual cortex (V1) respond to  
336 edges of different orientations (see above) neurons in V4 respond selectively to e.g. textures and  
337 colors (Okazawa et al., 2015) and neurons in IT show selectivity to particular faces or other objects  
338 (Gross et al., 1972; Logothetis and Pauls, 1995; Perrett et al., 1992; Tanaka et al., 1991). This  
339 property is manifested by differences in neuronal selectivity across areas of the visual cortical  
340 hierarchy with later stages exhibiting higher selectivity in comparison to earlier stages. For our  
341 model, we asked whether analysis of area-wise neuronal activity would also reveal increasing  
342 selectivity from the lowest to highest areas.

343 Figure 5 shows the distribution of image selectivity for neurons in each area of the model. The  
344 kurtosis was computed for each neuron based on its responses to all stimuli presented to the model  
345 (Equation 11) and used as a measure of image selectivity for a single neuron (Lehky et al., 2005). The  
346 figure shows that the mean image selectivity increases from the lowest to the highest area in the  
347 model. We compared the average selectivity in a given area with every other area in the model using  
348 Mann-Whitney's U test with Bonferroni correction for multiple comparisons. For all comparisons,  
349 the null hypothesis was rejected with  $p < 5.10^{-15}$ . Thus, image selectivity strongly increased when  
350 ascending in the visual cortical hierarchy. Importantly, this property was emergent in the sense that  
351 it was not preprogrammed in our algorithm.

### 352 **Sparseness**



353 A feature related to neuronal selectivity is sparseness, reflecting how scarcely or redundantly a  
354 feature or object is coded across the population in a given area (Montijn et al., 2015; Perez-Orive et  
355 al., 2002; Vinje and Gallant, 2000; Willmore and Tolhurst, 2001). A high or low sparseness can easily  
356 arise in a population with large variations in average neuronal activity. For instance, consider a  
357 population in which a single neuron has an average firing rate of 100 spikes/sec and all other  
358 neurons have an average firing rate of 10 spikes/sec. In this population, the peak in the distribution  
359 of population activity due to the neuron with high average activity will result in high sparseness. To  
360 overcome this problem in the analysis, we normalized the activity of all model neurons using their  
361 average activity and an individual estimate of kurtosis was obtained for each stimulus across all  
362 neurons in each area based on this normalized activity. Figure 6 shows a distribution of sparseness in  
363 each area. We found that the average value of sparseness across all stimuli in each area increased  
364 systematically from the lowest to highest area. For validation, we conducted a pairwise comparison  
365 of sparseness values in different areas using Mann-Whitney's U test with Bonferroni correction for  
366 multiple comparisons. For all comparisons between areas, the null hypothesis was rejected with  $p <$   
367  $5.10^{-34}$  in all cases.

### 368 **The relationship between the response magnitude of neurons, selectivity and sparseness**

369 We next studied the relationship between a neuron's average response to all stimuli and its  
370 selectivity. Similarly, for each area of the model we also investigated the relationship between a  
371 population's average response to a stimulus and its sparseness. The selectivity in different areas of  
372 the model exhibited wide variations. For the purpose of visualizing how the relationship between  
373 selectivity and mean neuronal activity evolves from lower to higher areas, we looked at the  
374 relationship between the log of selectivity and mean neuronal activity. We observed that, in all  
375 areas, there was a negative correlation between the selectivity and average neuronal activity, i.e.  
376 neurons with high selectivity had low average activity. Pearson correlation coefficients of -0.23, -  
377 0.05, -0.55 and -0.42 were obtained between selectivity and mean responses in areas 1 to 4,

378 respectively. This has also been reported in experimental data (Lehky et al., 2011). Further, this  
379 negative correlation became stronger from lower to higher areas in the model.

380 We conducted a similar study on the relationship between sparseness and average population  
381 activity. It has been reported in experimental data that the average population response shows little  
382 variation for different values of sparseness (Lehky et al., 2011). This was also the case for all model  
383 areas as we observed only weak correlations between sparseness and average population  
384 responses. Pearson correlation coefficients of -0.18, 0.02, 0.23 and 0.18 were obtained between  
385 sparseness and mean responses in areas 1 to 4, respectively. These similarities between the  
386 statistical properties of model neurons and data from animal experiments arise without being  
387 imposed by network design or training procedure.

#### 388 **Impact of neuronal selectivity and neuronal response range on sparseness**

389 Although selectivity and sparseness represent different aspects of neuronal activity, they are  
390 interconnected quantities, i.e. a population consisting of highly selective neurons will also exhibit  
391 sparseness in the population response to a single stimulus. However, it has also been observed in  
392 data recorded from macaque IT that the dynamic range of neuronal responses correlates more  
393 strongly with sparseness than selectivity (Lehky et al., 2011). Here, dynamic range was quantified  
394 using the interquartile range of neuronal responses, which is the difference between the 75<sup>th</sup> and  
395 25<sup>th</sup> percentiles of a neuron's responses to the individual stimuli presented. We asked which of the  
396 two factors, selectivity or dynamic range, contributed to sparseness in the responses of model  
397 neurons in different areas.

398 To examine the interactions between these network parameters, we estimated sparseness in  
399 three different sets of neuronal populations that differed in terms of selectivity and dynamic range.  
400 Figure 7 shows the histogram of interquartile ranges for neurons in each area. It can be observed  
401 that the dynamic range gradually increased from lower to higher areas as more neurons shifted  
402 away from low range values. For each area, we considered a first subset, denoted by 'SNR' (i.e.,  
403 Selective Neurons Removed), obtained by removing activities of the top 10% of neurons having the

404 highest selectivity in that area. To obtain the second subset of each area, denoted by 'DNR' (i.e.  
405 Dynamic range Neurons Removed), we eliminated the activities of the top 10% of neurons with the  
406 broadest interquartile ranges. Figure 8 also shows the distribution of sparseness of the third set, viz.  
407 including all neurons of an area (denoted by 'All') as well as for the two subsets described above. It  
408 can be clearly seen that sparseness is more dependent on neurons with high selectivity in  
409 comparison to neurons that exhibit a broad dynamic range. Thus, our model shows a strong  
410 influence of neuronal selectivity on sparseness. However, this behavior of the model was dependent  
411 on regularization (see Discussion).

#### 412 **Object classification performance**

413 We next studied the ability of the model with RFs to infer causes that generalize across different  
414 exemplars of a given object class. The exemplars varied in terms of object identity, viewing angle,  
415 size, etc. For this purpose, we trained separate Support Vector Machine (SVM) classifiers using  
416 latent representations of causes in each area of the model. Using a subset of the stimuli with which  
417 the model was trained, a linear SVM classifier was optimized to distinguish between representations  
418 of exemplars of two object classes, i.e. airplanes and automobiles. The remaining stimuli were used  
419 to estimate the performance of the SVM classifier which thus yields an estimate of the model's  
420 capacity to generalize across different exemplars of the same class.

421 To examine whether the representations in different areas exhibited better generalization  
422 progressively across ascending areas, we optimized a linear SVM classifier using representations for  
423 1500 stimuli randomly chosen from both classes and then computed its classification performance  
424 on the remaining 500 stimuli. This analysis was repeated 100 times by bootstrapping without  
425 replacement the samples selected for optimizing the linear SVM classifier. Figure 9B shows the  
426 classification performance of the SVM classifier for representations in different areas of the model.  
427 First, we observe a classification accuracy well above chance level in all areas (one sample t-test; p-  
428 values are lower than  $8.10^{-130}$  for all areas). Second, we observed a modest but systematic increase  
429 in the classification performance from the lowest to highest area of the model. This shows that

430 representations in higher areas can generalize better across unfamiliar exemplars than lower areas.  
431 To validate our results, we compared the accuracy in the topmost area with accuracy in other areas  
432 using Mann-Whitney's U test with Bonferroni correction for multiple comparisons. The maximum p-  
433 value of 0.0004 was obtained for the comparison between the accuracies of the topmost area and  
434 area 2. Based on these comparisons, the null hypothesis for all comparisons between areas was  
435 rejected at a significance level of at least 0.01. The maximum p-value of 0.0004 was obtained for the  
436 comparison between the accuracies of the topmost area and area 2.

437 To ensure that this result was not dependent on the number of stimuli used, we repeated this  
438 analysis with different stimulus sets. For this purpose, we optimized the SVM classifier on stimulus  
439 sets containing 1000 to 1500 stimuli in steps of 100 and evaluated its performance on the remaining  
440 stimuli. Figure 9C shows the performance of the classifiers optimized using different numbers of  
441 stimuli for different areas of the model. The generalizing capacity of the inferential representations  
442 in higher areas of the model was better than in the lower areas irrespective of the number of stimuli  
443 used to optimize the SVM classifier. For all comparisons, the null hypothesis could be rejected at a  
444 significance level of at least 0.05. The lowest level of significance was obtained for the comparison  
445 between the accuracies of the top area and area 2 ( $p < 1.10^{-21}$ ). Again, this model behavior arose  
446 emergently as it was not pre-programmed or built a priori into the network design.

447

## 448 **Discussion**

449 First, we described a general method to build neurobiologically plausible deep predictive coding  
450 models for estimating representations of causes of sensory information. Different hyperparameters  
451 of the network can be modified to model various aspects of cortical sensory hierarchies; for  
452 instance,  $N$  can be varied from 1 to 5 to study cortical hierarchies of increasing depth. This  
453 provides a mechanism to develop deep neural network models of information processing in the  
454 brain that can be used to simultaneously study properties of lower-level as well as higher-level brain  
455 areas. The models were trained using unsupervised, Hebbian learning and both the inference and

456 learning steps utilized only locally available information. Second, we found that several properties of  
457 neuronal and population responses emerge in the model without being imposed by network design  
458 or by the inference and learning steps. Image selectivity increased systematically from lower levels  
459 to higher levels and the average sparseness of inferred representations increased from lower levels  
460 to higher levels, which is in line with at least some experimental study (Okazawa et al., 2017).  
461 Hereby DHPC networks provide a biologically plausible solution to the problem of ‘combinatorial  
462 explosion’ which would arise if the occurrence of strongly object-selective (“grandmother cell”)  
463 responses has to be explained from the combination of individual, low-level features (Barlow, 1972;  
464 Riesenhuber and Poggio, 1999).

465 Furthermore, we studied object classification properties of the causes inferred by the model. The  
466 classifiers optimized using representations in higher areas exhibited better performance in  
467 comparison to those using lower-area representations. Thus, predictive coding may provide a useful  
468 basis for the formation of semantic concepts in the brain, at least when combined with networks  
469 performing categorization (e.g. in the medial temporal lobe (Quiroga et al., 2005) or prefrontal  
470 cortex (Freedman et al., 2003)).

#### 471 **Reproduction of experimental findings by the model**

472 The increase in image selectivity in ascending areas of DHPC networks has also been reported in  
473 experimental studies (Gross et al., 1972; Logothetis and Pauls, 1995; Tanaka et al., 1991). This can  
474 be attributed to the property that neurons in each model area are strongly active when the neurons  
475 within their receptive field exhibit a particular pattern of activity. For example, neurons in the lowest  
476 area of the model develop Gabor-like filters that resemble oriented edges and have been shown to  
477 form a representation code for natural scenes that consists of statistically independent components  
478 (Bell and Sejnowski, 1997). These low-level neurons will be strongly active when a particularly  
479 oriented edge is present within its receptive field. Similarly, a neuron at the next level will be  
480 strongly active when neurons within its receptive field at the lower level exhibit a specific pattern of  
481 activity. This implies that a neuron at this higher level will only become active when a particular

482 configuration of edges (rather than a single edge) occurs at a specific location in visual space,  
483 resulting in increased in complexity of features detected by neurons at this level. This increase in  
484 feature complexity of features detected by neurons in successive model areas leads to a  
485 corresponding increase in the average neuronal selectivity when ascending the hierarchy.

486 It could be argued that regularization will automatically lead to an increase in average selectivity  
487 in neuronal responses across model areas. To examine this possibility, we also trained models with  
488 no regularization (neither for synaptic weights nor inferred causes) while all other hyperparameters  
489 remained unchanged. These models also exhibited an increase in average selectivity across model  
490 areas (data not shown). However, adding regularization did result in an overall increase in average  
491 selectivity in each of the model areas. By definition, the responses of a selective neuron will have a  
492 high interquartile range. Thus, the increasing selectivity across model areas also leads to an increase  
493 in the average interquartile range across ascending model areas (Figure 7).

494 Unlike selectivity, there is no consensus in the literature on how sparseness varies along the cortical  
495 hierarchy due to a lack of consistency in experimental data. Responses of macaque V4 neurons were  
496 reported to exhibit higher sparseness in comparison to V2 neurons (Okazawa et al., 2017). In line  
497 with our results, these findings indicate that sparseness increases from lower-level to higher-level  
498 areas. In another study, however, it was shown that sparseness estimates based on responses of  
499 macaque V4 neurons did not differ significantly from estimates for IT neurons (Rust and DiCarlo,  
500 2012). Both of the above experimental studies quantified sparseness using the same two measures,  
501 namely the sparseness index described by (Vinje and Gallant, 2000) and entropy (Lehky et al., 2005).  
502 Although sparseness was quantified here using kurtosis, its estimates across different areas of the  
503 model exhibited the same relationship with one another when Vinje and Gallant's (Vinje and Gallant,  
504 2000) index of sparseness was used (figure not shown).

#### 505 **Regulation of sparseness**

506 Regularization had a strong influence on both average sparseness in each model area and on the  
507 relationship between average sparseness in different model areas. In the absence of any

508 regularization, average sparseness first increased and then decreased when ascending across areas  
509 (Figure S1). This can be attributed to the network property that all areas in the model infer causes  
510 that reconcile bottom-up and top-down information (Equation 4 and 6) received by an area, except  
511 for the top area where causes are determined only by bottom-up information. This lower constraint  
512 on the top area leads to a decrease in sparseness in areas farther away from the sensory input layer.  
513 Imposing regularization only on representations inferred in areas farther from the top to  
514 compensate for this lack of constraint did not alter this pattern of average sparseness across model  
515 areas (Figure S2). This is because sparse neuronal activity in higher areas induced by regularization  
516 results in sparse top-down predictions for lower areas which indirectly induce sparseness in  
517 representations inferred in lower areas. In this manner, sparseness induced in higher areas *spreads*  
518 throughout the network. Thus, regularization in higher areas leads to an increase in average  
519 sparseness in all model areas but does not alter the overall pattern of sparseness across different  
520 model areas. However, sparseness imposed by higher areas onto lower areas can be weakened by  
521 scaling down the errors due to top-down feedback, for example, using a value of  $\eta < 1$  in Equation  
522 6. Thus, sparseness depends strongly on multiple factors which include regularization, hierarchical  
523 position of an area, and the weights given to bottom-up and top-down errors. These results may  
524 provide an explanation for inconsistent results regarding sparseness observed in experimental data.  
525 In experiments, sparseness has been compared across two brain regions at most, and our model  
526 suggests that results obtained from such studies may not generalize to other brain regions.

527 Regularization was also a factor that affected whether high selectivity neurons or high dynamic  
528 range neurons contributed strongly towards sparseness in a given area (Figure 8). In the absence of  
529 regularization, sparseness in lower areas was determined by high selectivity neurons, but in higher  
530 areas sparseness was determined by high dynamic range neurons (Figure S3). This can be attributed  
531 to the network property that the bottom-up input to lower areas is more strongly driven by a fixed  
532 sensory input whereas in higher areas the bottom-up drive is based on constantly evolving  
533 representations. Stochastic fluctuations resulting from these evolving representations at the

534 inference step in higher areas lead to higher dynamic response ranges in these very areas. As a  
535 result, sparseness is more strongly determined by high dynamic response range neurons in higher  
536 areas, which is in line with the experimental results of (Lehky et al., 2011). However, adding  
537 regularization to the top area in the model constrains neural activity throughout the model, thereby  
538 reducing the dynamic response range of neurons (Figure S4). Furthermore, high regularization leads  
539 to neurons that are active for a small number of images. When the activity of such neurons is  
540 normalized by their mean activity, this can result in very high (relative) activity for some of these  
541 images. An estimate of kurtosis obtained from normalized neuronal activity can thus lead to  
542 arbitrarily high estimates of sparseness (Figure 8).

543 The relationship between statistical properties (selectivity and sparseness) of inferred  
544 representations is loosely consistent with the idea of ergodicity in experimental data. As defined in  
545 (Lehky et al., 2005), a neural system is termed '*weakly ergodic*' if the average selectivity of individual  
546 neurons across multiple stimuli is equal to the average sparseness. Experimental evidence for  
547 ergodicity has been reported in multiple cortical areas (Kadohisa et al., 2005; Verhagen et al., 2004).  
548 The average selectivity and sparseness of representations inferred by the model do not satisfy this  
549 equality but there is a close relationship between these two properties, as removal of highly  
550 selective neurons strongly degrades sparseness (Figure 8). Possibly, equality of average selectivity  
551 and sparseness is only satisfied under certain hyperparameter settings. This would require detailed  
552 exploration of the hyperparameter space and will be subject to future research.

### 553 **Object classification properties**

554 We showed that a binary SVM classifier optimized using higher-level representations performed  
555 better than a classifier trained on lower-level representations. This effect disappears when there is  
556 no regularization penalty (data not shown). Regularization of activity and synaptic strength forces  
557 the network to generate representations in which most neurons are inactive (or less active) and  
558 active neurons capture most of the information in the presented stimuli. This results in a  
559 representational code that allows better discrimination between object classes. Thus, regularization



560 helps improve the accuracy of the classifiers based on representations in each area significantly  
561 above chance level. In combination with increasing feature complexity in the network, this leads to a  
562 modest but systematic increase in classification performance from lower to higher-levels in the  
563 network.

#### 564 **Comparison with previous models**

565 Most of the previously proposed predictive coding models utilized specific architectures targeting  
566 simulation of particular physiological phenomena (e.g. mismatch negativity (Wacongne et al., 2012))  
567 or neuronal response properties (e.g. of V1 neurons (Rao and Ballard, 1999; Spratling, 2010)). (Rao  
568 and Ballard, 1999) proposed one of the first neural network models of predictive coding that was  
569 designed to study receptive field properties of V1 neurons such as Gabor filtering and end-stopping.  
570 With respect to their network, the specific advance of the current study is that it provides a  
571 methodology for building scalable, deep neural network models, e.g. to study neuronal properties of  
572 higher cortical areas. (Spratling, 2008) showed that predictive coding models can reproduce various  
573 effects associated with attention-like competition between spatial locations or stimulus features for  
574 processing. This study employed a network with two cortical regions, each having two to four  
575 neurons. A different study (Spratling, 2010) showed that predictive coding models can reproduce  
576 response properties of V1 neurons like orientation selectivity. These models consisted of a single  
577 cortical region corresponding to V1 and hence a top-down input was lacking. Both studies employed  
578 models with predefined synaptic strengths. In contrast, DHPC networks employ a Hebbian rule for  
579 adjusting synaptic strengths and estimating representations. They can be trained using images of  
580 essentially arbitrary dimensions. Further, DHPC networks not only showed basic properties like  
581 orientation selectivity at lower levels but simultaneously showed high stimulus selectivity and  
582 sparseness in higher areas, thus unifying these different phenomena in a single model.

583 (Spratling, 2012b) presented a predictive coding model in which synaptic strengths were adapted  
584 using rules that utilized locally available information. This study used models having one or two  
585 areas with specific, pre-set architectural parameters like receptive field size and size of image

586 patches. Using predictive coding (Wacongne et al., 2012) showed that a network model trained to  
587 perform an oddball paradigm can reproduce different physiological properties associated with  
588 mismatch negativity. This study simulated a network architecture with two cortical columns, each of  
589 which had a pre-established selectivity for specific auditory tones. Unlike these studies (Spratling,  
590 2012b; Wacongne et al., 2012), DHPC networks provide a mechanistic framework for developing  
591 predictive processing models with scalable architectural attributes corresponding to biological  
592 analogues like receptive field size and number of brain areas. In the current study, DHPC networks  
593 were scaled up to contain millions of synapses and thousands of neurons whereas most existing  
594 predictive coding models have simulated networks with up to hundreds of neurons and thousands  
595 of synapses. Furthermore, DHPC networks reproduce in the same architecture many attributes of  
596 neuronal responses without explicit a priori incorporation of these properties in the model.  
597 Probably, the approach closest to our work is by (Lotter et al., 2017) who employed networks  
598 consisting of stacked modules. This network was specifically designed to predict the next frame in  
599 videos and was trained using end-to-end error-backpropagation which is unlikely to be realized in  
600 the brain. However, an interesting aspect of this model is the use of recurrent representational units  
601 which allows the network to capture temporal dynamics of the input. This aspect will be an  
602 interesting direction of future research for the unsupervised Hebb-based models we proposed here.

### 603 **Anatomical substrate of predictive coding**

604 An intriguing question related to predictive coding is its potential neuroanatomical substrate in the  
605 brain. Several studies have looked at possible biological realizations of predictive coding based on  
606 physiological and anatomical evidence (Bastos et al., 2012; Keller & Mrsic-Flogel, 2018; Pennartz, et  
607 al., 2019). DHPC networks are well compatible with insights from several experimental studies on  
608 predictive coding and error signalling (Leinweber et al., 2017; Schwiedrzik and Freiwald, 2017) and  
609 cortical connectivity (Douglas and Martin, 2004; Rockland and Pandya, 1979). However, some  
610 aspects of predictive coding that were highlighted by experimental studies have not yet been  
611 explicitly modeled by the current DHPC networks. A combination of experimental and modelling

612 studies predicts that neurons coding inferential representations are present in superficial as well as  
613 deep layers of sensory cortical areas (Pennartz et al., 2019). Representation neurons in the deep  
614 layers are proposed to transmit top-down predictions to error neurons located in the superficial  
615 layers of the lower area they project to (Bastos et al., 2012; Pennartz et al., 2019). These error  
616 neurons also receive input from local representation neurons in superficial layers of the same area  
617 and transmit bottom-up errors to the granular layer of the higher area they project to. This  
618 anatomical configuration was not considered in the current DHPC networks because it requires  
619 explicitly modeling various cell types located in different neocortical layers and the interactions  
620 between them. This will be a direction of future research as it will help bridge the gap between  
621 theoretical models and biologically relevant aspects of cortical architectures implementing  
622 predictive coding.

623

#### 624 **Acknowledgements**

625 We would like to thank Walter Senn and Mihai Petrovici for helpful discussions and Sandra  
626 Diaz, Anna Lührs, Thomas Lippert for the use of supercomputers at the Jülich  
627 Supercomputing Centre, Forschungszentrum Jülich. Additionally, we are grateful to Surfsara  
628 for use of the Lisa cluster. This work was supported by the European Union's Horizon 2020  
629 Framework Programme for Research and Innovation under the Specific Grant Agreement  
630 No. 785907 (Human Brain Project SGA2 to C.M.A.P.).

631

#### 632 **References**

- 633 Barlow, H.B., 1972. Single Units and Sensation: A Neuron Doctrine for Perceptual  
634 Psychology? *Perception* 1, 371–394. <https://doi.org/10.1068/p010371>  
635 Barlow, H.B., 1953. Summation and inhibition in the frog's retina. *J. Physiol.* 119, 69–88.  
636 <https://doi.org/10.1113/jphysiol.1953.sp004829>  
637 Bastos, A.M., Usrey, W.M., Adams, R.A., Mangun, G.R., Fries, P., Friston, K.J., 2012.  
638 Canonical Microcircuits for Predictive Coding. *Neuron* 76, 695–711.  
639 <https://doi.org/10.1016/j.neuron.2012.10.038>

- 640 Bell, A.J., Sejnowski, T.J., 1997. The “independent components” of natural scenes are edge  
641 filters. *Vision Res.* 37, 3327–3338. [https://doi.org/10.1016/S0042-6989\(97\)00121-1](https://doi.org/10.1016/S0042-6989(97)00121-1)
- 642 Dayan, P., Hinton, G.E., Neal, R.M., Zemel, R.S., 1995. The Helmholtz Machine. *Neural*  
643 *Comput.* 7, 889–904. <https://doi.org/10.1162/neco.1995.7.5.889>
- 644 Desimone, R., Albright, T.D., Gross, C.G., Bruce, C., 1984. Stimulus-selective properties of  
645 inferior temporal neurons in the macaque. *J. Neurosci.* 4, 2051–2062.  
646 <https://doi.org/10.1523/JNEUROSCI.04-08-02051.1984>
- 647 Douglas, R.J., Martin, K.A.C., 2004. Neuronal Circuits of the Neocortex. *Annu. Rev. Neurosci.*  
648 27, 419–451. <https://doi.org/10.1146/annurev.neuro.27.070203.144152>
- 649 Felleman, D.J., Van Essen, D.C., 1991. Distributed hierarchical processing in the primate  
650 cerebral cortex. *Cereb. Cortex N. Y. N* 1991 1, 1–47.
- 651 Freedman, D.J., Riesenhuber, M., Poggio, T., Miller, E.K., 2003. A Comparison of Primate  
652 Prefrontal and Inferior Temporal Cortices during Visual Categorization. *J. Neurosci.*  
653 23, 5235–5246. <https://doi.org/10.1523/JNEUROSCI.23-12-05235.2003>
- 654 Friston, K., 2005. A theory of cortical responses. *Philos. Trans. R. Soc. B Biol. Sci.* 360, 815–  
655 836. <https://doi.org/10.1098/rstb.2005.1622>
- 656 Gregory, R.L., 1980. Perceptions as hypotheses. *Philos. Trans. R. Soc. Lond. B Biol. Sci.* 290,  
657 181–197.
- 658 Grosf, D.H., Shapley, R.M., Hawken, M.J., 1993. Macaque VI neurons can signal ‘illusory’  
659 contours. *Nature* 365, 550. <https://doi.org/10.1038/365550a0>
- 660 Gross, C.G., Rocha-Miranda, C.E., Bender, D.B., 1972. Visual properties of neurons in  
661 inferotemporal cortex of the Macaque. *J. Neurophysiol.* 35, 96–111.  
662 <https://doi.org/10.1152/jn.1972.35.1.96>
- 663 Helmholtz, H. von, 1867. *Handbuch der physiologischen Optik.* Voss.
- 664 Helmholtz, H. von, Southall, J.P.C., 2005. *Treatise on physiological optics,* Dover ed. ed,  
665 Dover phoenix editions. Dover Publications, Mineola, NY.
- 666 Hinton, G.E., Zemel, R.S., 1994. Autoencoders, Minimum Description Length and Helmholtz  
667 Free Energy, in: Cowan, J.D., Tesauro, G., Alspector, J. (Eds.), *Advances in Neural*  
668 *Information Processing Systems 6.* Morgan-Kaufmann, pp. 3–10.
- 669 Hubel, D.H., Wiesel, T.N., 1961. Integrative action in the cat’s lateral geniculate body. *J.*  
670 *Physiol.* 155, 385–398. <https://doi.org/10.1113/jphysiol.1961.sp006635>
- 671 Hubel, D.H., Wiesel, T.N., 1959. Receptive fields of single neurones in the cat’s striate cortex.  
672 *J. Physiol.* 148, 574–591.
- 673 Jones, E.G., 2000. Microcolumns in the cerebral cortex. *Proc. Natl. Acad. Sci.* 97, 5019–5021.  
674 <https://doi.org/10.1073/pnas.97.10.5019>
- 675 Kadohisa, M., Verhagen, J.V., Rolls, E.T., 2005. The primate amygdala: Neuronal  
676 representations of the viscosity, fat texture, temperature, grittiness and taste of  
677 foods. *Neuroscience* 132, 33–48.  
678 <https://doi.org/10.1016/j.neuroscience.2004.12.005>
- 679 Kant, I., 1998. *Critique of pure reason,* The Cambridge edition of the works of Immanuel  
680 Kant. Cambridge University Press, Cambridge ; New York.
- 681 Keller, G.B., Bonhoeffer, T., Hübener, M., 2012. Sensorimotor Mismatch Signals in Primary  
682 Visual Cortex of the Behaving Mouse. *Neuron* 74, 809–815.  
683 <https://doi.org/10.1016/j.neuron.2012.03.040>
- 684 Keller, G.B., Mrsic-Flogel, T.D., 2018. Predictive Processing: A Canonical Cortical  
685 Computation. *Neuron* 100, 424–435. <https://doi.org/10.1016/j.neuron.2018.10.003>

- 686 Kobatake, E., Tanaka, K., 1994. Neuronal selectivities to complex object features in the  
687 ventral visual pathway of the macaque cerebral cortex. *J. Neurophysiol.* 71, 856–867.  
688 <https://doi.org/10.1152/jn.1994.71.3.856>
- 689 Lee, T.S., Mumford, D., 2003. Hierarchical Bayesian inference in the visual cortex. *J. Opt.*  
690 *Soc. Am. A* 20, 1434. <https://doi.org/10.1364/JOSAA.20.001434>
- 691 Lehky, S.R., Kiani, R., Esteky, H., Tanaka, K., 2011. Statistics of visual responses in primate  
692 inferotemporal cortex to object stimuli. *J. Neurophysiol.* 106, 1097–1117.  
693 <https://doi.org/10.1152/jn.00990.2010>
- 694 Lehky, S.R., Sejnowski, T.J., Desimone, R., 2005. Selectivity and sparseness in the responses  
695 of striate complex cells. *Vision Res.* 45, 57–73.  
696 <https://doi.org/10.1016/j.visres.2004.07.021>
- 697 Lehky, S.R., Sereno, A.B., 2007. Comparison of Shape Encoding in Primate Dorsal and Ventral  
698 Visual Pathways | *Journal of Neurophysiology*. *J. Neurophysiol.* 97, 307–319.
- 699 Leinweber, M., Ward, D.R., Sobczak, J.M., Attinger, A., Keller, G.B., 2017. A Sensorimotor  
700 Circuit in Mouse Cortex for Visual Flow Predictions. *Neuron* 95, 1420-1432.e5.  
701 <https://doi.org/10.1016/j.neuron.2017.08.036>
- 702 Lettvin, J., Maturana, H., McCulloch, W., Pitts, W., 1959. What the Frog’s Eye Tells the Frog’s  
703 Brain. *Proc. IRE* 47, 1940–1951. <https://doi.org/10.1109/JRPROC.1959.287207>
- 704 Lillicrap, T.P., Cownden, D., Tweed, D.B., Akerman, C.J., 2016. Random synaptic feedback  
705 weights support error backpropagation for deep learning. *Nat. Commun.* 7, 13276.  
706 <https://doi.org/10.1038/ncomms13276>
- 707 Logothetis, N.K., Pauls, J., 1995. Psychophysical and Physiological Evidence for Viewer-  
708 centered Object Representations in the Primate. *Cereb. Cortex* 5, 270–288.  
709 <https://doi.org/10.1093/cercor/5.3.270>
- 710 Lotter, W., Kreiman, G., Cox, D., 2017. Deep Predictive Coding Networks for Video Prediction  
711 and Unsupervised Learning, in: *International Conference of Learning*  
712 *Representations*.
- 713 Markov, N.T., Vezoli, J., Chameau, P., Falchier, A., Quilodran, R., Huissoud, C., Lamy, C.,  
714 Misery, P., Giroud, P., Ullman, S., Barone, P., Dehay, C., Knoblauch, K., Kennedy, H.,  
715 2014. Anatomy of hierarchy: Feedforward and feedback pathways in macaque visual  
716 cortex: Cortical counterstreams. *J. Comp. Neurol.* 522, 225–259.  
717 <https://doi.org/10.1002/cne.23458>
- 718 Marques, T., Nguyen, J., Fioreze, G., Petreanu, L., 2018. The functional organization of  
719 cortical feedback inputs to primary visual cortex. *Nat. Neurosci.* 21, 757–764.  
720 <https://doi.org/10.1038/s41593-018-0135-z>
- 721 Montijn, J.S., Goltstein, P.M., Pennartz, C.M., 2015. Mouse V1 population correlates of  
722 visual detection rely on heterogeneity within neuronal response patterns. *eLife* 4,  
723 e10163. <https://doi.org/10.7554/eLife.10163>
- 724 Mumford, D., 1992. On the computational architecture of the neocortex: II. The role of  
725 cortico-cortical loops. *Biol. Cybern.* 66, 241–251.
- 726 Okazawa, G., Tajima, S., Komatsu, H., 2017. Gradual Development of Visual Texture-  
727 Selective Properties Between Macaque Areas V2 and V4. *Cereb. Cortex* 27, 4867–  
728 4880. <https://doi.org/10.1093/cercor/bhw282>
- 729 Okazawa, G., Tajima, S., Komatsu, H., 2015. Image statistics underlying natural texture  
730 selectivity of neurons in macaque V4. *Proc. Natl. Acad. Sci.* 112, E351–E360.  
731 <https://doi.org/10.1073/pnas.1415146112>
- 732 Pennartz, C.M.A., 2015. *The brain’s representational power*. The MIT press.

- 733 Pennartz, C.M.A., 2009. Identification and integration of sensory modalities: Neural basis  
734 and relation to consciousness. *Conscious. Cogn.* 18, 718–739.  
735 <https://doi.org/10.1016/j.concog.2009.03.003>
- 736 Pennartz, C.M.A., Dora, S., Muckli, L., Lorteije, J.A.M., 2019. Towards a Unified View on  
737 Pathways and Functions of Neural Recurrent Processing. *Trends Neurosci.*  
738 S0166223619301286. <https://doi.org/10.1016/j.tins.2019.07.005>
- 739 Perez-Orive, J., Mazor, O., Turner, G.C., Cassenaer, S., Wilson, R.I., Laurent, G., 2002.  
740 Oscillations and Sparsening of Odor Representations in the Mushroom Body. *Science*  
741 297, 359–365. <https://doi.org/10.1126/science.1070502>
- 742 Perrett, D.I., Hietanen, J.K., Oram, M.W., Benson, P.J., 1992. Organization and functions of  
743 cells responsive to faces in the temporal cortex. *Philos. Trans. R. Soc. Lond. B. Biol.*  
744 *Sci.* 335, 23–30. <https://doi.org/10.1098/rstb.1992.0003>
- 745 Perrett, D.I., Smith, P.A.J., Potter, D.D., Mistlin, A.J., Head, A.S., Milner, A.D., Jeeves, M.A.,  
746 1985. Visual Cells in the Temporal Cortex Sensitive to Face View and Gaze Direction.  
747 *Proc. R. Soc. Lond. B Biol. Sci.* 223, 293–317.
- 748 Quiroga, R.Q., Reddy, L., Kreiman, G., Koch, C., Fried, I., 2005. Invariant visual representation  
749 by single neurons in the human brain. *Nature* 435, 1102–1107.  
750 <https://doi.org/10.1038/nature03687>
- 751 Rao, R.P.N., Ballard, D.H., 1999. Predictive coding in the visual cortex: a functional  
752 interpretation of some extra-classical receptive-field effects. *Nat. Neurosci.* 2, 79–87.  
753 <https://doi.org/10.1038/4580>
- 754 Richter, D., Ekman, M., de Lange, F.P., 2018. Suppressed Sensory Response to Predictable  
755 Object Stimuli throughout the Ventral Visual Stream. *J. Neurosci.* 38, 7452–7461.  
756 <https://doi.org/10.1523/JNEUROSCI.3421-17.2018>
- 757 Riesenhuber, M., Poggio, T., 1999. Hierarchical models of object recognition in cortex. *Nat.*  
758 *Neurosci.* 2, 1019–1025. <https://doi.org/10.1038/14819>
- 759 Rockland, K.S., Pandya, D.N., 1979. Laminal origins and terminations of cortical connections  
760 of the occipital lobe in the rhesus monkey. *Brain Res.* 179, 3–20.
- 761 Rumelhart, D.E., Hinton, G.E., Williams, R.J., 1986. Learning representations by back-  
762 propagating errors. *Nature* 323, 533. <https://doi.org/10.1038/323533a0>
- 763 Rust, N.C., DiCarlo, J.J., 2012. Balanced Increases in Selectivity and Tolerance Produce  
764 Constant Sparseness along the Ventral Visual Stream. *J. Neurosci.* 32, 10170–10182.  
765 <https://doi.org/10.1523/JNEUROSCI.6125-11.2012>
- 766 Salimans, T., Ho, J., Chen, X., Sidor, S., Sutskever, I., 2017. Evolution Strategies as a Scalable  
767 Alternative to Reinforcement Learning. *ArXiv170303864 Cs Stat.*
- 768 Schwiedrzik, C.M., Freiwald, W.A., 2017. High-Level Prediction Signals in a Low-Level Area of  
769 the Macaque Face-Processing Hierarchy. *Neuron* 96, 89-97.e4.  
770 <https://doi.org/10.1016/j.neuron.2017.09.007>
- 771 Smith, F.W., Muckli, L., 2010. Nonstimulated early visual areas carry information about  
772 surrounding context. *Proc. Natl. Acad. Sci.* 107, 20099–20103.  
773 <https://doi.org/10.1073/pnas.1000233107>
- 774 Spratling, M.W., 2012a. Unsupervised Learning of Generative and Discriminative Weights  
775 Encoding Elementary Image Components in a Predictive Coding Model of Cortical  
776 Function. *Neural Comput.* 24, 60–103. [https://doi.org/10.1162/NECO\\_a\\_00222](https://doi.org/10.1162/NECO_a_00222)
- 777 Spratling, M.W., 2012b. Unsupervised learning of generative and discriminative weights  
778 encoding elementary image components in a predictive coding model of cortical  
779 function. *Neural Comput.* 24, 60–103. [https://doi.org/10.1162/NECO\\_a\\_00222](https://doi.org/10.1162/NECO_a_00222)

- 780 Spratling, M.W., 2010. Predictive Coding as a Model of Response Properties in Cortical Area  
781 V1. *J. Neurosci.* 30, 3531–3543. <https://doi.org/10.1523/JNEUROSCI.4911-09.2010>
- 782 Spratling, M.W., 2008. Predictive coding as a model of biased competition in visual  
783 attention. *Vision Res.* 48, 1391–1408. <https://doi.org/10.1016/j.visres.2008.03.009>
- 784 Srinivasan, M.V., Laughlin, S.B., Dubs, A., 1982. Predictive coding: a fresh view of inhibition  
785 in the retina. *Proc. R. Soc. Lond. B Biol. Sci.* 216, 427–459.  
786 <https://doi.org/10.1098/rspb.1982.0085>
- 787 Tanaka, K., Saito, H., Fukada, Y., Moriya, M., 1991. Coding visual images of objects in the  
788 inferotemporal cortex of the macaque monkey. *J. Neurophysiol.* 66, 170–189.  
789 <https://doi.org/10.1152/jn.1991.66.1.170>
- 790 Verhagen, J.V., Kadohisa, M., Rolls, E.T., 2004. Primate Insular/Opercular Taste Cortex:  
791 Neuronal Representations of the Viscosity, Fat Texture, Grittiness, Temperature, and  
792 Taste of Foods. *J. Neurophysiol.* 92, 1685–1699.  
793 <https://doi.org/10.1152/jn.00321.2004>
- 794 Vinje, W.E., Gallant, J.L., 2000. Sparse Coding and Decorrelation in Primary Visual Cortex  
795 During Natural Vision. *Science* 287, 1273–1276.  
796 <https://doi.org/10.1126/science.287.5456.1273>
- 797 Wacongne, C., Changeux, J.-P., Dehaene, S., 2012. A Neuronal Model of Predictive Coding  
798 Accounting for the Mismatch Negativity. *J. Neurosci.* 32, 3665–3678.  
799 <https://doi.org/10.1523/JNEUROSCI.5003-11.2012>
- 800 Willmore, B., Tolhurst, D.J., 2001. Characterizing the sparseness of neural codes. *Netw.*  
801 *Comput. Neural Syst.* 12, 255–270. <https://doi.org/10.1088/0954-898X/12/3/302>  
802  
803

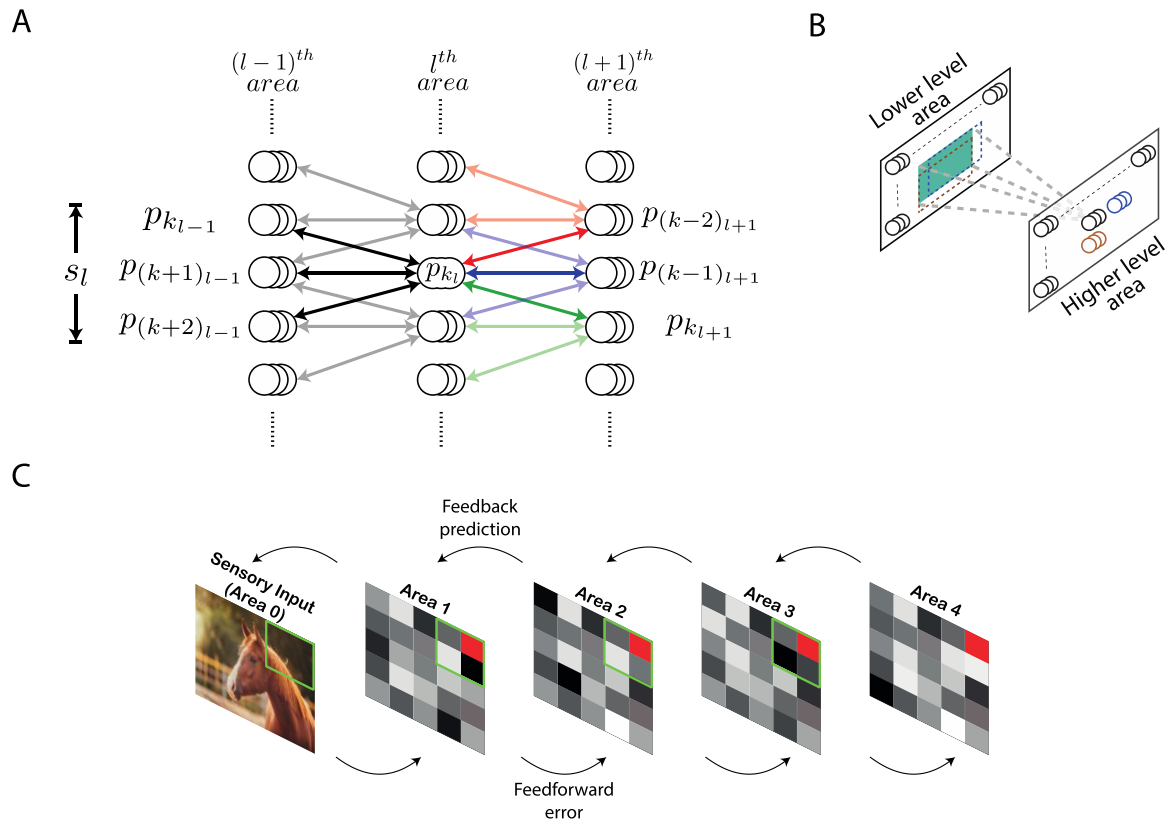

804  
805

806 Figure 1. Architecture of the deep predictive coding network with receptive fields. (A) A population  
807 of neurons having identical receptive fields is represented by three overlapping circles.  $p_{k_l}$  denotes  
808 the  $k^{th}$  population in the  $l^{th}$  area and  $s_l$  is the size of the receptive field of all populations in the  $l^{th}$   
809 area. Both  $s_l$  and  $s_{l+1}$  have been set to 3 here. For this value of  $s_l$ , the populations  $p_{k_{l-1}}$  through  
810  $p_{(k+2)_{l-1}}$  constitute the receptive field of the population  $p_{k_l}$  (their connections are represented by  
811 black lines). Similarly, for this value of  $s_{l+1}$ ,  $p_{k_l}$  will be present in the projective fields of populations  
812  $p_{(k-2)_{l+1}}$  through  $p_{k_{l+1}}$ . The populations within the projective fields of  $p_{(k-2)_{l+1}}$ ,  $p_{(k-1)_{l+1}}$  and  $p_{k_{l+1}}$   
813 have been shown using red, blue and green arrows, respectively. Their connections with  $p_{k_l}$  are  
814 rendered in full color while other connections are shown in light colors. (B) For processing images,  
815 neuronal populations in each area can be visualized in a two-dimensional grid. Each population  
816 exhibits a two-dimensional receptive field (the receptive field of an example population in a higher-  
817 level area is shown in green). As a result, the receptive fields of two different populations can exhibit  
818 different overlaps horizontally and vertically. The receptive fields of two horizontally adjacent



819 populations (black and blue) overlap completely in the vertical direction and partially in the  
820 horizontal direction. Similarly, the receptive fields of two vertically adjacent populations (black and  
821 brown) overlap completely in the horizontal direction and partially in the vertical direction. (C) An  
822 overview of the network with  $n_l = 1$  for all areas. Sensory input is presented to the network  
823 through Area 0. Activity of neurons in areas 1-4 is represented by tiles in grayscale colors. The green  
824 square in a lower area denotes the receptive field of the population represented as a red tile in the  
825 higher area.  
826

827

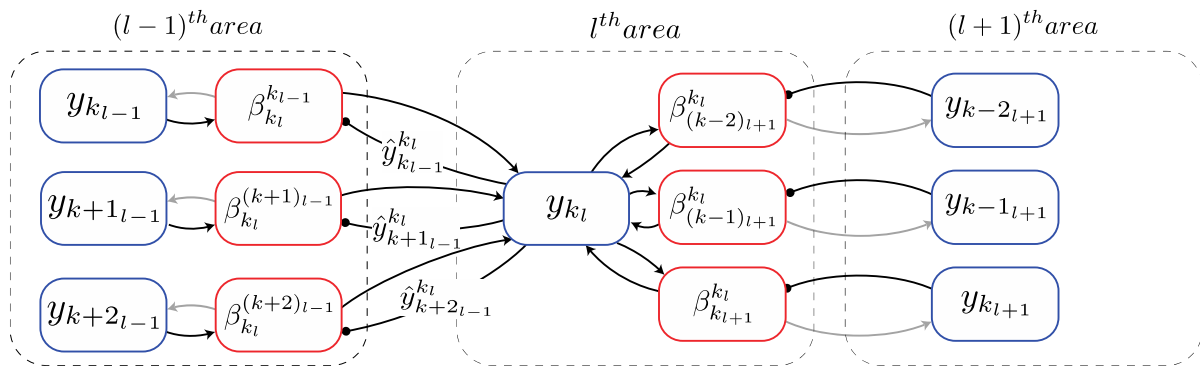

828

829 Figure 2. Biologically motivated realization of deep predictive coding. Each rectangle denotes a  
 830 population of neurons that represents a specific signal, computed in predictive coding. The  
 831 particular signal is denoted by the text inside the circle. The populations that compute errors are  
 832 denoted by red blocks and the populations that represent inferred causes are denoted by blue  
 833 blocks. Arrows represent excitatory connections and circles denote inhibitory connections (note that  
 834 inhibitory interneurons were not explicitly modelled here). The connections that are conveying  
 835 information that is required for the inference and learning steps of predictive coding are shown as  
 836 black lines and other connections are shown in grey. See main text for explanation of symbols.

837

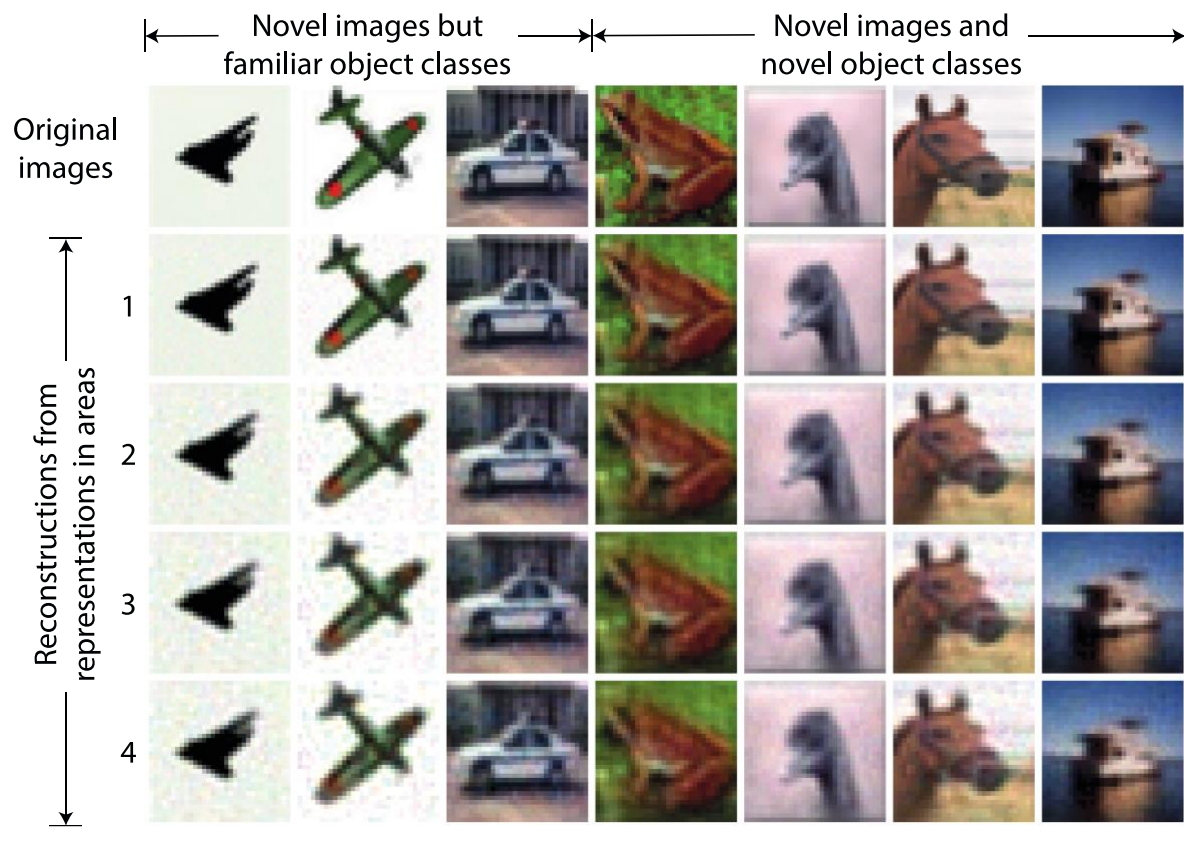

840 Figure 3. Examples of reconstructions obtained using causes inferred by the trained model  
841 without receptive fields. Each column represents an example of a sensory input. The three  
842 leftmost images represent novel stimuli from object classes used in training whereas other  
843 images are from object classes not used in training. The top row shows the novel sensory  
844 input that was presented to the network to allow it to construct latent representations  
845 across the areas. Rows 2 to 5 show the reconstructions of the sensory input obtained using  
846 the latent representations in the corresponding areas of the model. It can be observed that  
847 the reconstructed sensory input faithfully reproduces the novel originals, although the  
848 lower areas regenerate the inputs more sharply.

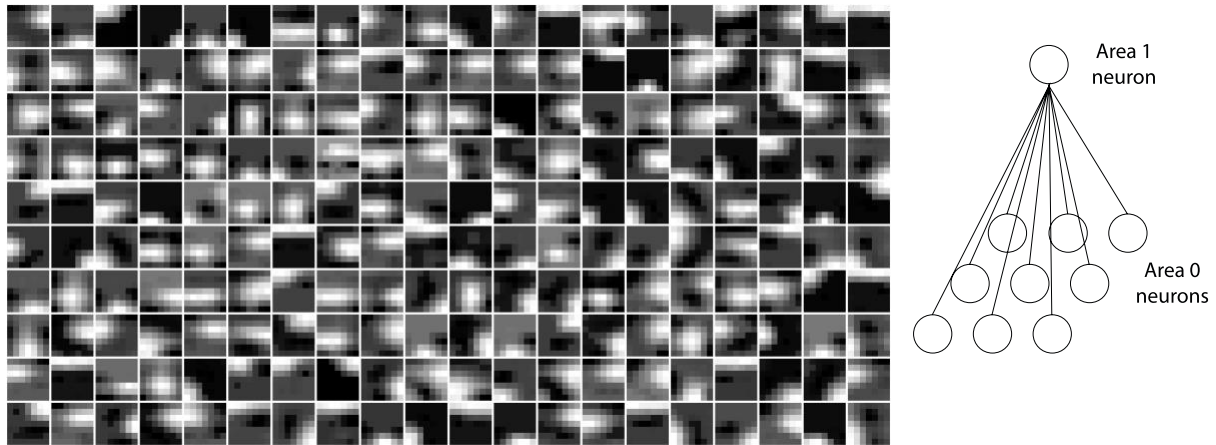

849  
850

851 Figure 4. Emergence of orientation selectivity in the lowermost area (area 1) of a trained model with  
852 receptive fields. Plots show normalized synaptic strengths for connections between area 1 and 0 (i.e.  
853 the input layer) of the model. Each box shows a symbolic representation of synaptic strengths from a  
854 randomly selected area 1 neuron to all area 0 neurons within its receptive field (right panel). Darker  
855 regions in the images correspond to synaptic strengths closer to zero and brighter regions in the  
856 images correspond to strengths closer to 1. It can be observed that receptive fields of many cells  
857 contain non-isotropic patches imposing orientation selectivity on neural responses in area 1.

858

A

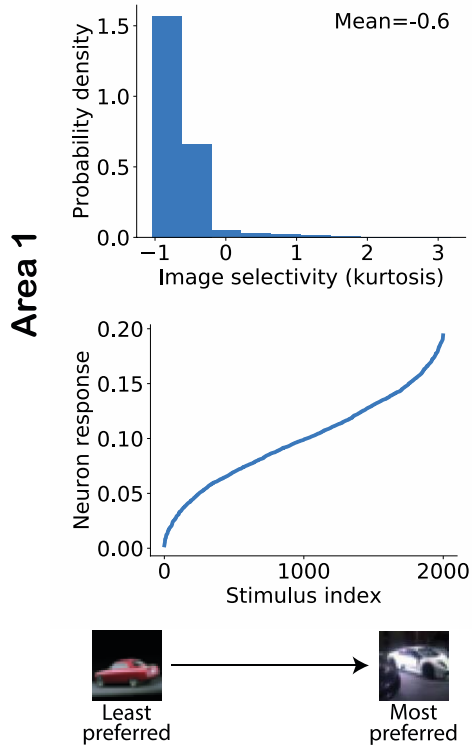

B

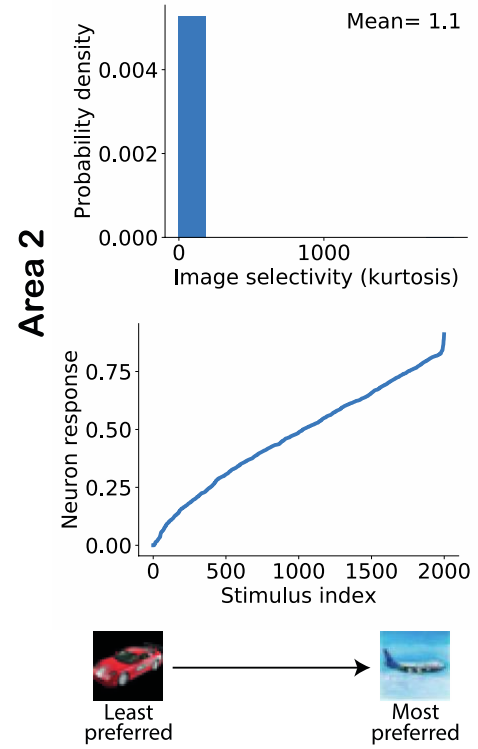

C

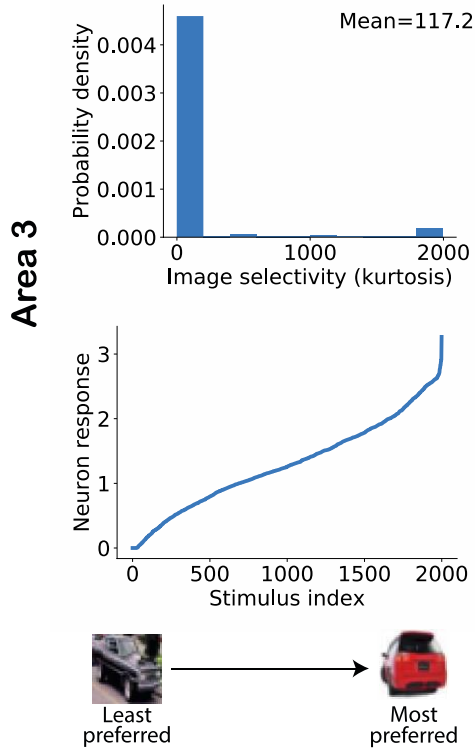

D

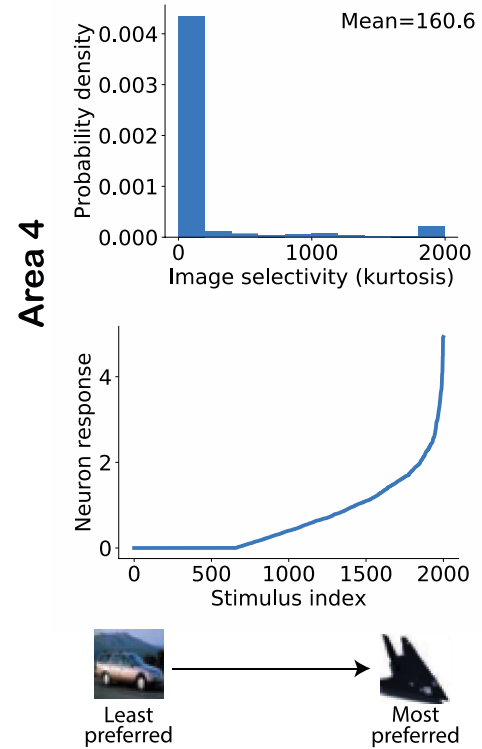

859  
860

861

862 Figure 5. Image selectivity of model neurons. (A-D) Distribution of image selectivity of  
863 neurons in each area of the model (top panels; A: lowest area/Area 1; D: highest area/Area  
864 4). The mean value of neuronal image selectivity for each area is shown in the top right  
865 corner of the corresponding plots. (Bottom panel) The activity of a randomly chosen neuron  
866 in each corresponding area has been sorted according to its response strength for all stimuli  
867 presented to the network. It can be observed that the average selectivity of neurons  
868 increases from lower to higher areas in line with experimental data.  
869

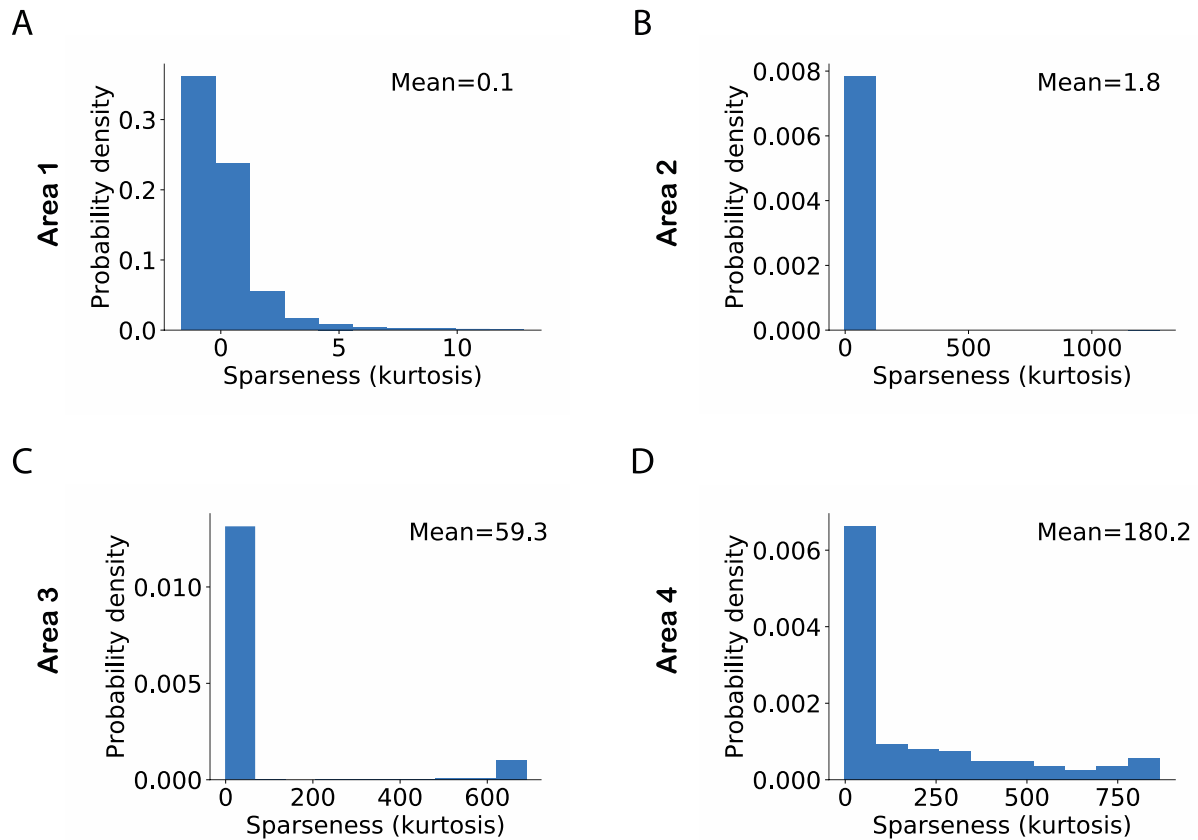

870

871 Figure 6. Sparseness in neuronal activity across ascending areas of the model. Sparseness was  
872 measured as the kurtosis across all neuronal responses in a given area and given a single stimulus.  
873 The mean value of sparseness is computed by averaging these estimates of kurtosis across all  
874 stimuli. (A-D) Distribution of sparseness in each area. The mean value of sparseness for each area is  
875 shown in the top right corner of each plot. It can be noted that the average sparseness of all neurons  
876 in model areas increases from lower to higher areas in agreement with some of the experimental  
877 studies.

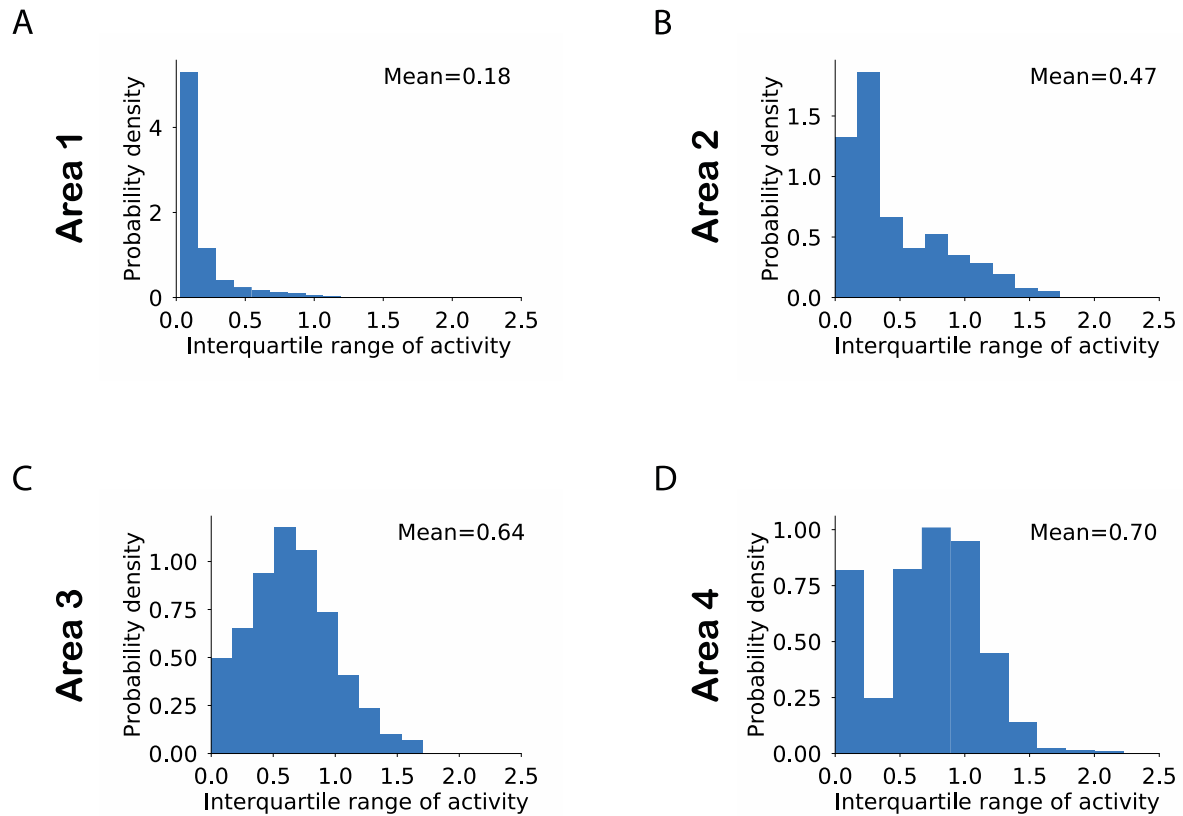

878  
879

880

881 Figure 7. (A-D) Distribution of the dynamic range of neurons computed as the interquartile range of  
882 the neuronal responses in a given area across all stimuli. The mean value for each area is computed  
883 by averaging across interquartile ranges for all neurons in that area.

884



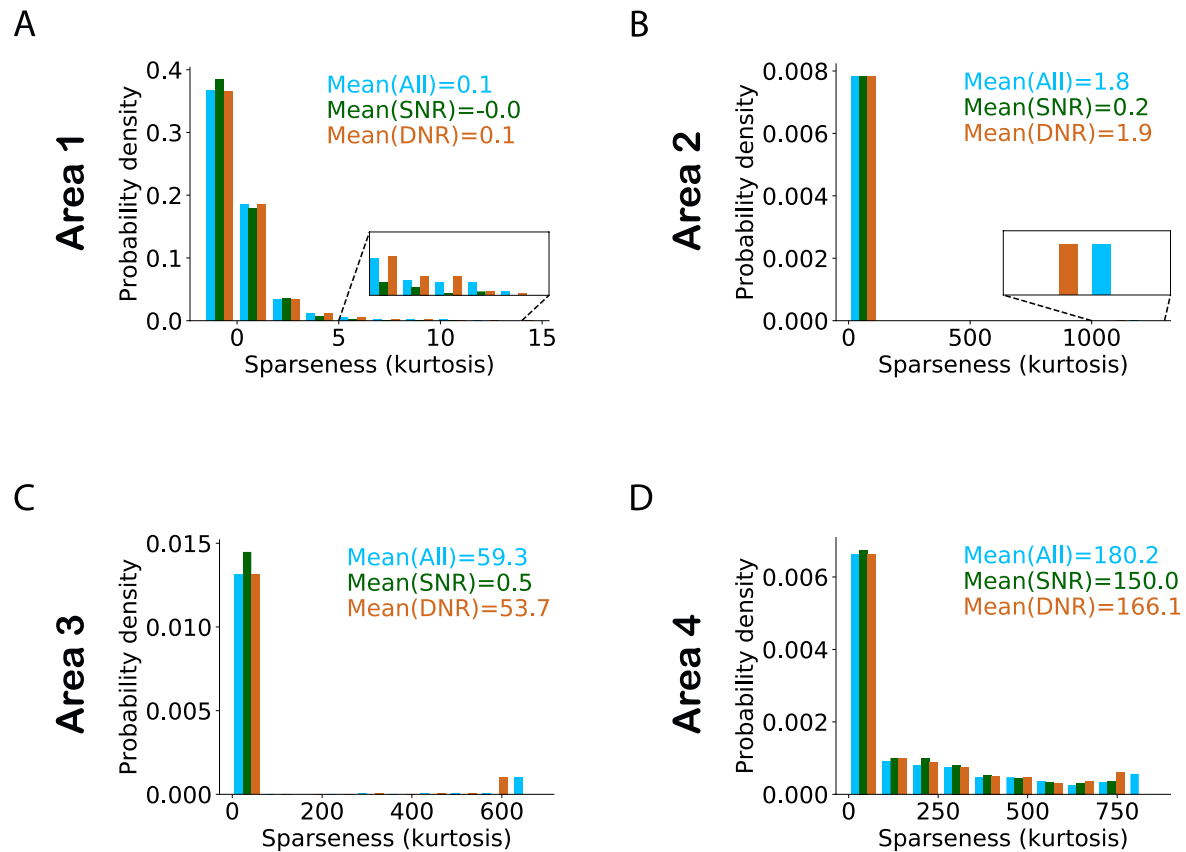

885  
886

887 Figure 8. Effect of high selectivity and high dynamic response range neurons on sparseness.

888 Histogram of sparseness for three different populations of neurons. The distribution of  
889 sparseness for all neurons is shown in blue. The population in which the top 10% most  
890 selective neurons were removed (SNR) is shown in dark green and light brown color denotes  
891 the populations in which neurons with high dynamic response range were removed (DNR).

892 Values represent the mean sparseness estimates for the different populations in  
893 corresponding colors. In all areas of the model (except area 1) it can be observed that the  
894 mean sparseness drops much more strongly on removal of highly selective neurons in  
895 comparison to removal of neurons with high dynamic range.

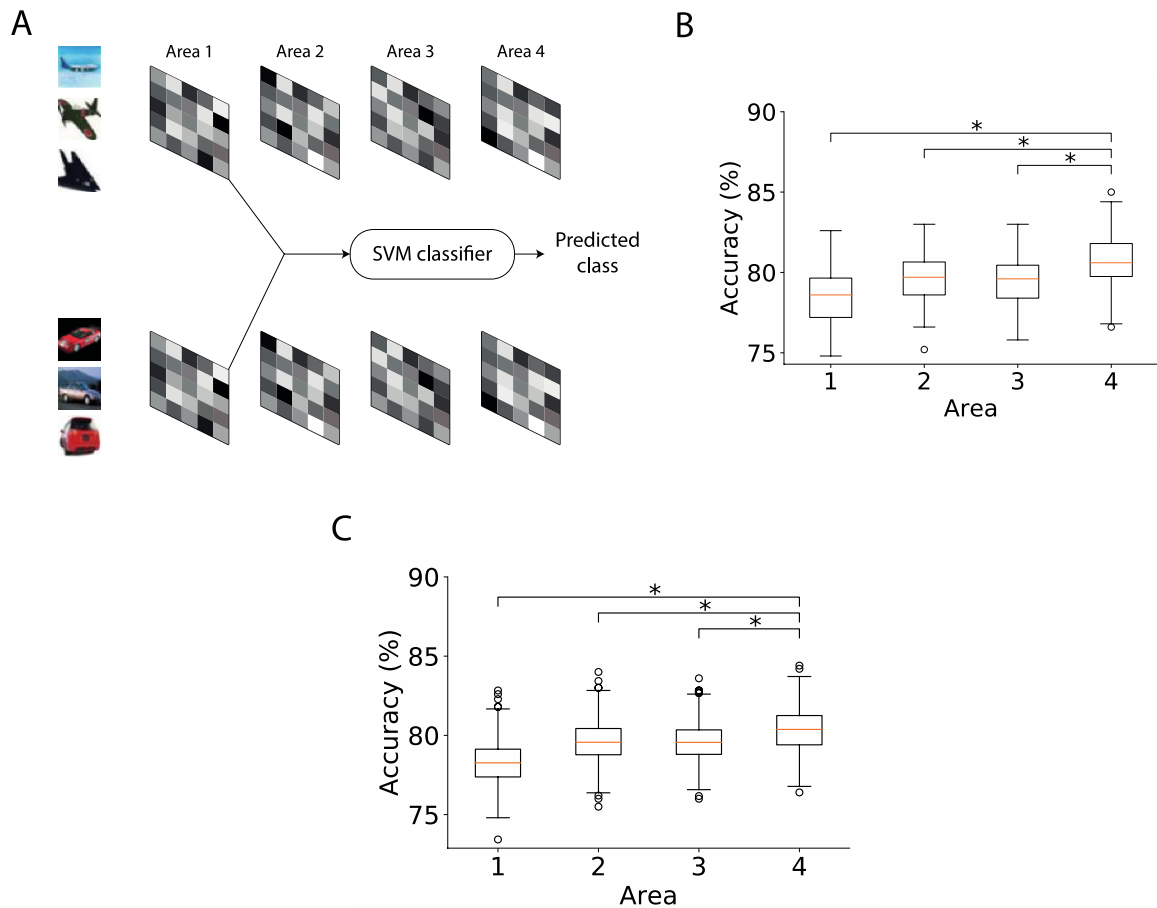

896

897 Figure 9. Object classification performance based on the representations of inferred causes across

898 ascending areas. (A) Method used for computing the accuracy of a classifier based on causes, in this

899 case, inferred in area 1. The inferred causes for a given stimulus are presented to a Support Vector

900 Machine (SVM) classifier whose output is used to determine the predicted class (airplanes vs cars) of

901 a given stimulus. This procedure is repeated for all areas. (B) Boxplot of classification performance in

902 different areas using 1500 randomly selected samples for optimization. Horizontal lines of the boxes

903 denote the first, second and third quartiles. Whiskers represent the entire range of data and circles

904 denote outliers. The second quartile in all areas was significantly above chance level accuracy (one

905 sample t-test,  $*p < 0.05$ ). The performance of the classifier optimized using area 4 representations

906 was significantly higher than the performance of classifiers of other areas (Mann-Whitney's U test

907 with Bonferroni correction,  $*p < 0.05$ ). (C) Boxplot of classification performance in different areas

908 using different numbers of samples for optimization. The number of samples did not affect the

909 conclusions observed in (B) (Mann-Whitney's U test with Bonferroni correction,  $*p < 0.05$ ).

910

911

### Supplementary Figures

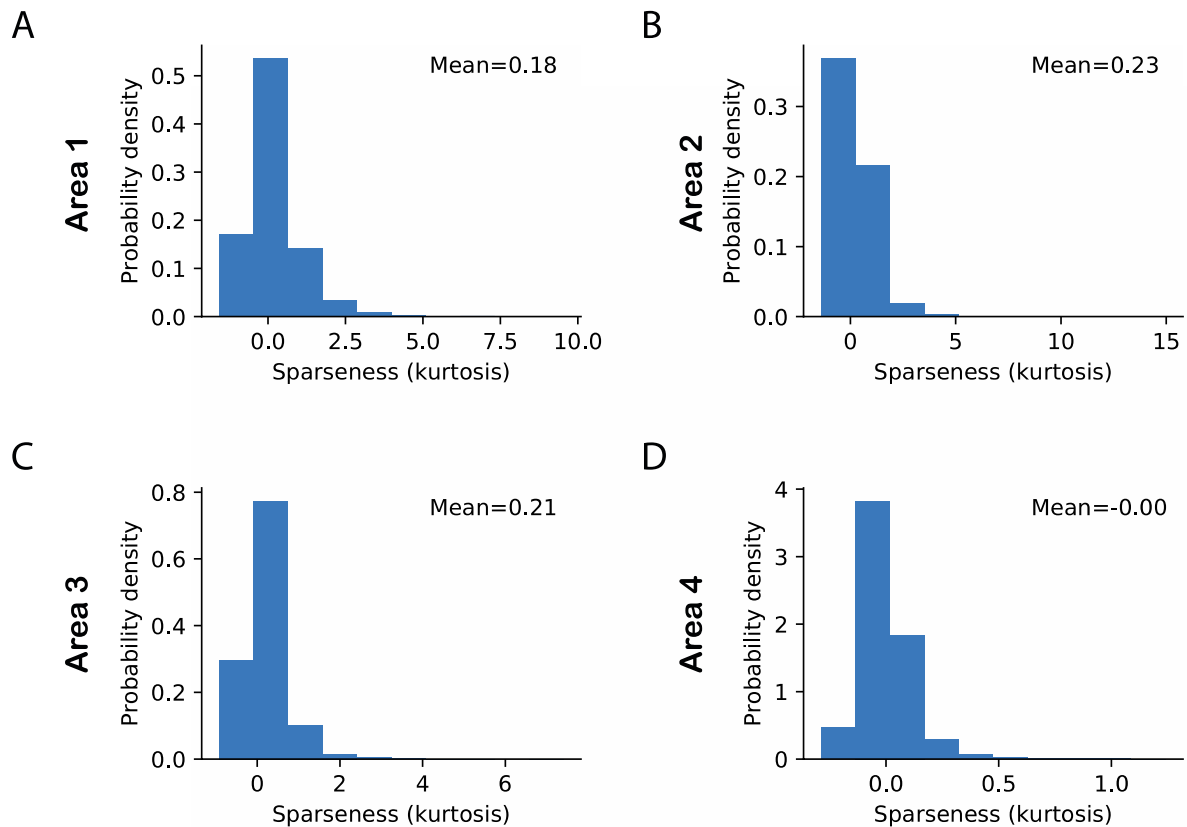

912  
913

914 Figure S1. Sparseness in neuronal activity across ascending areas in a linear model without  
915 regularization of weights and activity. Sparseness was measured as the kurtosis across all neuronal  
916 responses in a given area and given a single stimulus. The mean value of sparseness (top right  
917 corner) was computed by averaging these estimates of kurtosis across all stimuli. (A-D) Distribution  
918 of sparseness in each area. We used models with a linear activation function as exemplars of  
919 models without regularization because ReLu enforces neural activity to be always positive, thereby  
920 requiring a strong regularization penalty. In the absence of regularization, the average sparseness in  
921 the model increased modestly from areas 1 and 2 and then decreased in areas 3 and 4. Despite its  
922 modest effect size, this pattern was observed across multiple models with a varying number of  
923 areas. This is attributed to the network property that all areas in the model (except the top area)  
924 infer causes that reconcile bottom-up and top-down information (Equation 4 and 6) whereas causes  
925 in the top area are only determined by bottom-up information. The lower constraint on the top area

926 leads to lower sparseness in this area. This effect was not limited to the top area alone; it was  
927 generally applicable to areas in the hierarchy that were farther away from the sensory input layer.  
928  
929  
930

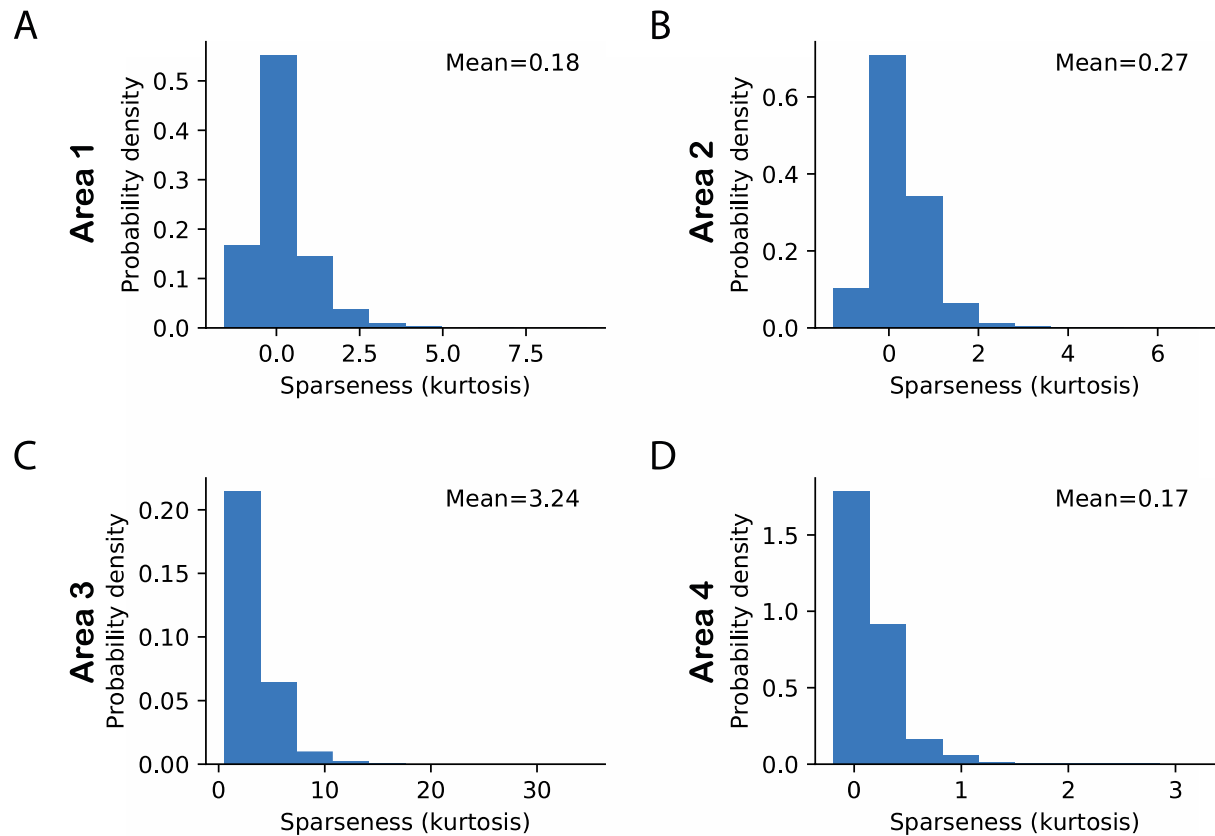

931  
932

933

934 Figure S2. Sparseness in neuronal activity across ascending areas in a linear model with  
935 regularization only in the top area. Sparseness was quantified as in fig. S1. The mean sparseness (top  
936 right corner) was computed by averaging these estimates of kurtosis across all stimuli. (A-D)  
937 Distribution of sparseness in each area. Having regularization only in the top area presents an  
938 interesting case because this indirectly regularizes all other model areas. Regularization-induced  
939 sparseness in area 4 results in sparse top-down predictions propagating to area 3, which indirectly  
940 induces sparseness in area 3 representations. Compared to Figure S1, regularization results in an  
941 increase in sparseness in area 4 and indirectly leads to an increase in sparseness in areas lower than  
942 area 4. This effect is stronger in area 3 and becomes weaker as one moves away from the top area.  
943

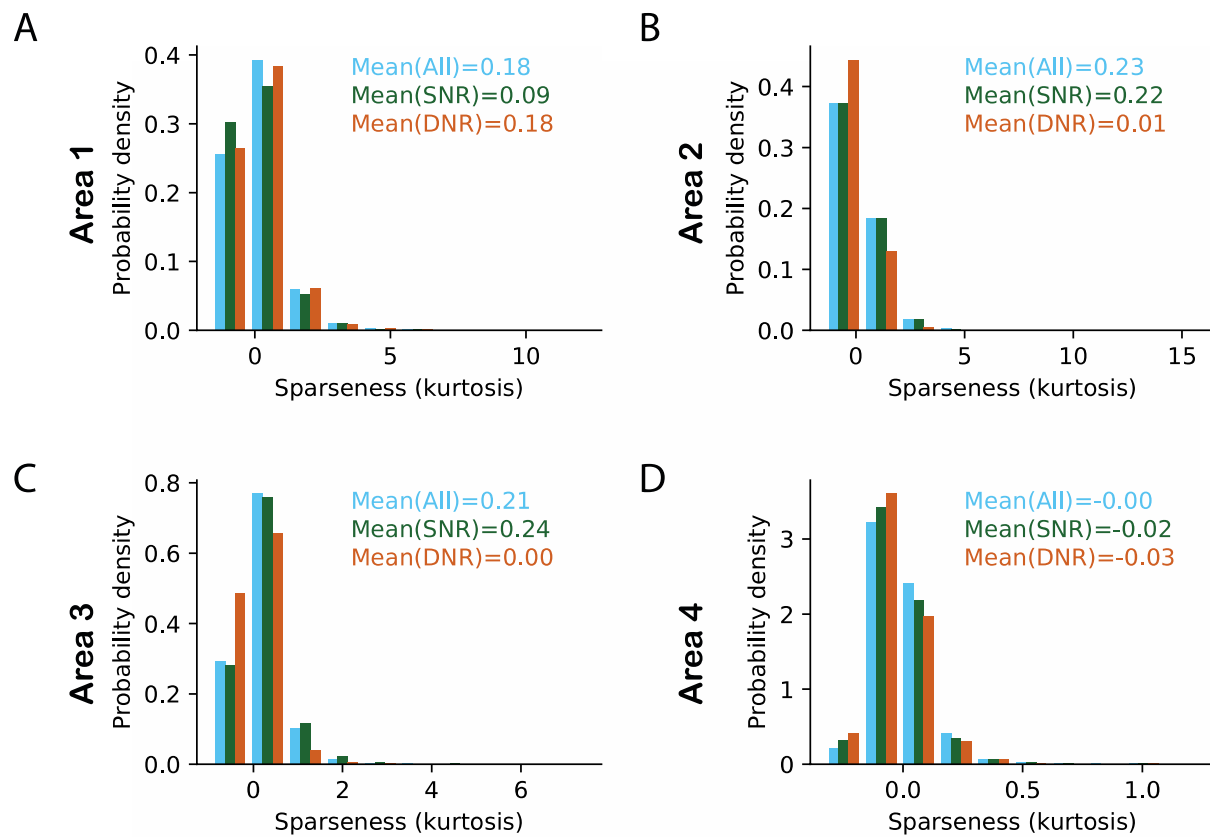

944

945 Figure S3. Effect of high selectivity and high dynamic response range neurons on sparseness

946 in a linear model with no regularization. (A-D) Histogram of sparseness for three different

947 populations of neurons. The distribution of sparseness for all neurons has been shown in

948 blue. The population in which the top 10% of most selective neurons was removed (SNR) is

949 shown in dark green and light brown color denotes the populations in which neurons with

950 high dynamic response range were removed (DNR). Values in top right corner represent

951 mean sparseness estimates for the different populations in corresponding colors. It can be

952 observed that high-selectivity neurons contribute to sparseness in the lowest area (area 1)

953 whereas in areas 2 and 3 the high dynamic range neurons contribute to sparseness. Despite

954 modest effect sizes, this pattern was observed across multiple model variants. The effects

955 are attributed to the network property that area 1 receives a bottom-up input based on a

956 fixed visual image. Other areas in the network receive a bottom-up drive based on a

957 constantly evolving set of latent representations. This leads to higher dynamic ranges in  
958 areas 2 to 3 and, as a result, sparseness is strongly determined by the dynamic response  
959 range in these areas.

960

961



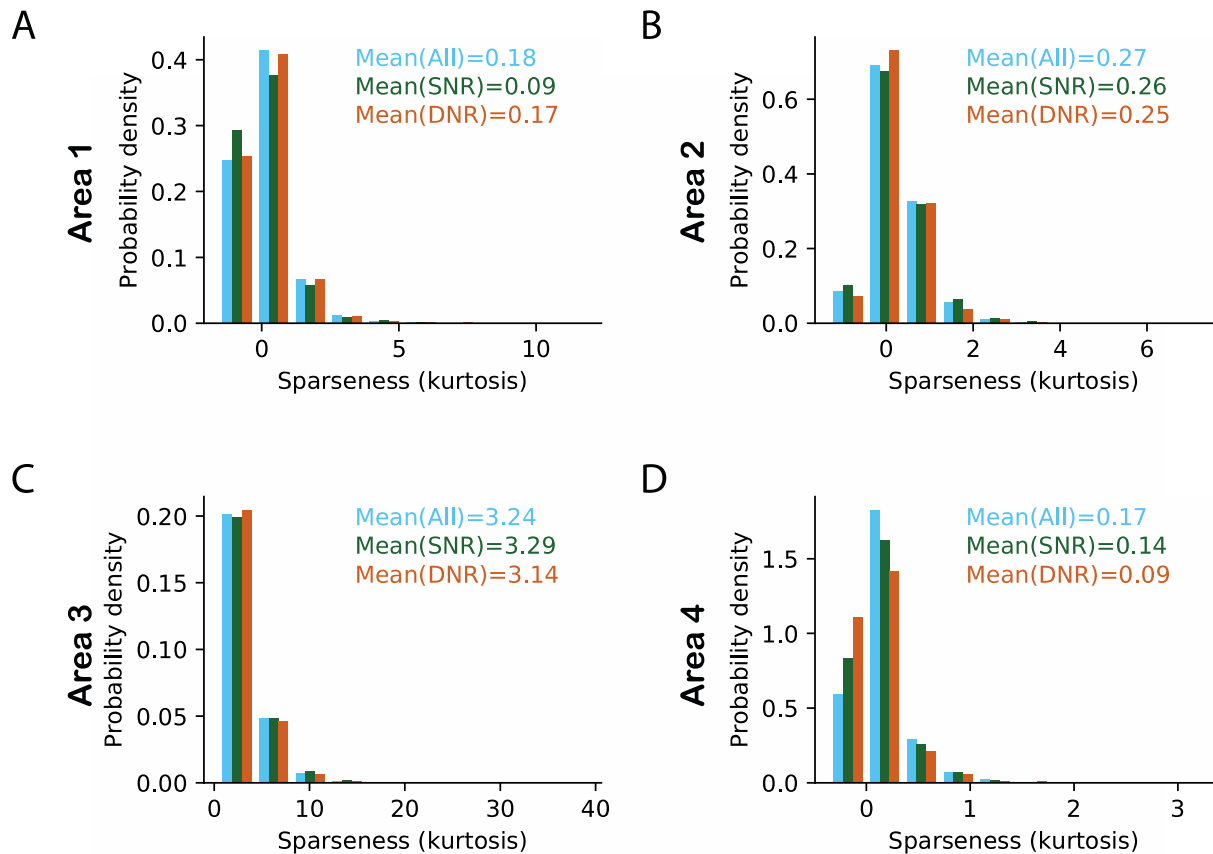

962

963

964 Figure S4. Effect of high selectivity and high dynamic response range neurons on sparseness

965 in a linear model with regularization only in the top area. (A-D) Histograms of sparseness for

966 three different populations of neurons. The distribution of sparseness for all neurons is

967 shown in blue. For plotting conventions, see figure S3. As a result of adding regularization to

968 the top area, the contribution of high dynamic range neurons to sparseness is weakened in

969 areas 2 and 3 (cf. Figure S3). This effect likely arises because regularization, by definition,

970 reduces neuronal activity; via a top-down spreading effect this leads to lower dynamic

971 ranges in areas 2 and 3. In turn, this reduces the contribution of high dynamic range

972 neurons to sparseness in these areas.

973
